# Supplementary material for: Lifestyle Interventions to Prevent Type 2 Diabetes in Women with a History of Gestational Diabetes: A Systematic Review and Meta-Analysis through the Lens of Health Equity
Source: MDPI journal article supplement (doi:10.3390/nu15214666), 2023-11-03
Supplement: s1 [file s1]

# **Lifestyle Interventions to Prevent Type 2 Diabetes in Women with A History of Gestational Diabetes: A Systematic Review and Meta-Analysis Through the Lens of Health Equity**

Gebresilasea Gendisha Ukke<sup>1</sup>, Jacqueline A Boyle<sup>1</sup>, Ahmed Reja<sup>2</sup>, Wai Kit Lee<sup>3</sup>, Mingling Chen<sup>4</sup>, Michelle Shi Min Ko<sup>5</sup>, Chelsea Alycia<sup>3</sup>, Jane Kwon<sup>6</sup>, and Siew Lim<sup>1\*</sup>

<sup>1</sup> Health Systems and Equity, Eastern Health Clinical School, Monash University, Level 2, 5 Arnold Street Box Hill, Victoria, 3128, Australia; [gebresilasea.ukke@monash.edu](mailto:gebresilasea.ukke@monash.edu) (G.U.); [jacqueline.boyle@monash.edu](mailto:jacqueline.boyle@monash.edu) (J.B.); [siew.lim1@monash.edu](mailto:siew.lim1@monash.edu) (S. L.)

<sup>2</sup> School of Medicine, College of Health Sciences, Addis Ababa University, Addis Ababa, Ethiopia; [ahmedreja@yahoo.com](mailto:ahmedreja@yahoo.com)

<sup>3</sup> Faculty of Medicine, Nursing and Health Sciences, Monash University, 264 Ferntree Gully Rd, Notting Hill Victoria, 3168, Australia; [wlee0019@student.monash.edu](mailto:wlee0019@student.monash.edu) (W.L.); [caly0001@student.monash.edu](mailto:caly0001@student.monash.edu) /[chelseaalycia18@gmail.com](mailto:chelseaalycia18@gmail.com)

<sup>4</sup> Monash Centre for Health Research and Implementation, Monash University, Level 1, 43-51 Kanooka Grove Clayton Victoria, 3168, Australia; [mingling.Chen@monash.edu](mailto:mingling.Chen@monash.edu)

<sup>5</sup> MD Programme, Duke-NUS Medical School, 8 College Rd, Singapore 169857; [michelle.ko.shi.min@u.duke.nus.edu](mailto:michelle.ko.shi.min@u.duke.nus.edu)

<sup>6</sup> Diabetes Victoria, Suite G01/15-31 Pelham St, Carlton Victoria 3053, Australia; [jkwon@diabetesvic.org.au](mailto:jkwon@diabetesvic.org.au)

\* Correspondence: [siew.lim1@monash.edu](mailto:siew.lim1@monash.edu) (S. L.)

## **Outline:**

**Table S1.** Search strategy

**Table S2.** Risk of bias assessment

**Table S3.** Subgroup analyses of the effect of lifestyle intervention in women with a history of gestational diabetes on incidence of T2DM by PROGRESS<sup>a</sup> framework

**Table S4.** Subgroup analyses of the effect of lifestyle intervention in women with a history of gestational diabetes on bodyweight by PROGRESS<sup>a</sup> framework

**Table S5.** Subgroup analyses of the effect of lifestyle intervention in women with a history of gestational diabetes on BMI by PROGRESS<sup>a</sup> framework

**Figure S1.** Funnel plots for publication bias

**Figure S2.** Forest plots

**Table S1. Search Strategy (MEDLINE)**

| #  | Query                                                                  |
|----|------------------------------------------------------------------------|
| 1  | Diabetes, Gestational/                                                 |
| 2  | gestational diabetes.mp.                                               |
| 3  | gestational diabetes mellitus.mp.                                      |
| 4  | GDM.mp.                                                                |
| 5  | 1 or 2 or 3 or 4                                                       |
| 6  | Diabetes Mellitus, Type 2/                                             |
| 7  | Glucose Intolerance/                                                   |
| 8  | diabetes.mp.                                                           |
| 9  | diabetes mellitus.mp.                                                  |
| 10 | type 2 diabetes.mp.                                                    |
| 11 | type 2 diabetes mellitus.mp.                                           |
| 12 | non-insulin dependent diabetes mellitus.mp.                            |
| 13 | NIDDM.mp.                                                              |
| 14 | impaired fasting glucose.mp.                                           |
| 15 | IFG.mp.                                                                |
| 16 | Impaired glucose tolerance.mp.                                         |
| 17 | IGT.mp.                                                                |
| 18 | maternal complication*.mp.                                             |
| 19 | 6 or 7 or 8 or 9 or 10 or 11 or 12 or 13 or 14 or 15 or 16 or 17 or 18 |
| 20 | lifestyle.ab,ti.                                                       |
| 21 | behavio?r.ab,ti.                                                       |
| 22 | Diet*.ab,ti.                                                           |
| 23 | "diet reduce*".ab,ti.                                                  |
| 24 | "diet restricted*".ab,ti.                                              |
| 25 | "nutriti*".ab,ti.                                                      |
| 26 | "educat*".ab,ti.                                                       |
| 27 | "exercis*".ab,ti.                                                      |
| 28 | "physical activit*".ab,ti.                                             |
| 29 | 20 or 21 or 22 or 23 or 24 or 25 or 26 or 27 or 28                     |
| 30 | "therap*".ab,ti.                                                       |
| 31 | "intervention*".ab,ti.                                                 |
| 32 | 30 or 31                                                               |
| 33 | 29 and 32                                                              |
| 34 | 5 and 19 and 33                                                        |

\*= truncation

**Table S2. Risk of bias assessment**

**a) Risk of bias of the included RCT studies**

| <b>Study</b>                 | <b>Randomization process</b> | <b>Deviations from intended interventions</b> | <b>Missing outcome data</b> | <b>Measurement of the outcome</b> | <b>Selection of the reported result</b> | <b>Overall Bias</b> |
|------------------------------|------------------------------|-----------------------------------------------|-----------------------------|-----------------------------------|-----------------------------------------|---------------------|
| Cheung 2011[58]              | Some concerns                | High                                          | High                        | Some concerns                     | Some concerns                           | High                |
| Cheung 2019/2022 [32, 59]    | Some concerns                | High                                          | Low                         | Low                               | Low                                     | High                |
| Ferrara 2011[48]             | Some concerns                | Low                                           | High                        | Low                               | Low                                     | High                |
| Hu 2012;[35] Liu 2018[61]    | Low                          | Low                                           | Low                         | Low                               | Some concerns                           | Some concerns       |
| Kim 2012[63]                 | Some concerns                | Low                                           | Low                         | Low                               | Low                                     | Some concerns       |
| Lim 2021[41]                 | Low                          | Low                                           | Low                         | Low                               | Low                                     | Low                 |
| McIntyre 2012[68]            | Low                          | Low                                           | Low                         | Low                               | Low                                     | Low                 |
| McManus 2018;[51]            |                              |                                               |                             |                                   |                                         |                     |
| Barton 2019[69]              | Some concerns                | High                                          | Low                         | Low                               | Low                                     | High                |
| Nicklas 2014[52]             | Low                          | High                                          | Low                         | Low                               | Some concerns                           | High                |
| O'Dea 2015[54]               | Low                          | Low                                           | High                        | Low                               | Low                                     | High                |
| O'Reilly 2916/2019[33, 71]   | Low                          | High                                          | Low                         | Low                               | Low                                     | High                |
| Peacock 2015[53]             | Low                          | High                                          | High                        | Low                               | Some concerns                           | High                |
| Perze-Ferre 2015[72]         | Some concerns                | High                                          | Low                         | Low                               | Some concerns                           | High                |
| Ratner 2008;[67]             |                              |                                               |                             |                                   |                                         |                     |
| Aroda 2015;[66] Man 2021[47] | Low                          | Low                                           | Low                         | Low                               | Low                                     | Low                 |
| Reinhardt 2012[44]           | Some concerns                | High                                          | Low                         | Some concerns                     | Some concerns                           | High                |
| Rollo 2020[29]               | Some concerns                | High                                          | High                        | Low                               | Some concerns                           | High                |
| Shek 2014[74]                | High                         | High                                          | Low                         | Low                               | Some concerns                           | High                |
| Sheng 2012[75]               | Some concerns                | High                                          | Low                         | Some concerns                     | Low                                     | High                |
| Shyams 2013/2015[76, 77]     | Low                          | Low                                           | Low                         | Low                               | Some concerns                           | Some concerns       |
| Smith 2014[55]               | Some concerns                | Low                                           | High                        | Low                               | Some concerns                           | High                |

|                          |               |      |     |               |               |      |
|--------------------------|---------------|------|-----|---------------|---------------|------|
| Tandon 2022[38]          | Low           | Low  | Low | Low           | Low           | Low  |
| Wien 1999[78]            | Some concerns | High | Low | Low           | Some concerns | High |
| Yu Xiao 2012[79]         | Some concerns | High | Low | Some concerns | Low           | High |
| Zilberman K.<br>2018[80] | High          | High | Low | Low           | Some concerns | High |

**b) Risk of bias of the included cluster-RCT studies**

| Study                                             | Randomization process | Identification or recruitment of participants | Deviations from intended interventions | Missing outcome data | Measurement of the outcome | Selection of the reported result | Overall Bias  |
|---------------------------------------------------|-----------------------|-----------------------------------------------|----------------------------------------|----------------------|----------------------------|----------------------------------|---------------|
| Ferrara 2016[60]                                  | Low                   | Low                                           | Low                                    | Low                  | Low                        | Low                              | Low           |
| Guo 2021[43];<br>Chen 2022[45];<br>Zhong 2023[46] | Low                   | Low                                           | Some concerns                          | Low                  | Low                        | Low                              | Some concerns |
| Holmes 2018[50]                                   | Some concerns         | Low                                           | Low                                    | High                 | Low                        | Some concerns                    | High          |
| Lee 2022[65]                                      | Low                   | Some concerns                                 | High                                   | High                 | Low                        | Low                              | High          |
| Li 2021[40]                                       | Low                   | Some concerns                                 | Low                                    | High                 | High                       | Low                              | High          |
| Potzel 2022[56]                                   | High                  | High                                          | Low                                    | Low                  | Some concerns              | Some concerns                    | High          |

**b) Risk of bias of the included non-RCT studies**

| Study         | Confounding | Selection of participants | Classification of interventions | Deviations from intended interventions | Missing data | Measurement of outcomes | Selection of the reported result | Overall Bias |
|---------------|-------------|---------------------------|---------------------------------|----------------------------------------|--------------|-------------------------|----------------------------------|--------------|
| Kim 2021[64]  | Low         | Low                       | Low                             | Moderate                               | Moderate     | Moderate                | Low                              | Moderate     |
| Geng 2014[49] | Serious     | Moderate                  | Low                             | Moderate                               | Low          | Low                     | Moderate                         | Serious      |

d) Quality assessment of the included single-arm studies

| NOS criteria                                                                    | Study       |               |              |             |                      |          |                |             |
|---------------------------------------------------------------------------------|-------------|---------------|--------------|-------------|----------------------|----------|----------------|-------------|
|                                                                                 | Kapoor 2018 | McCurley 2017 | Brazeau 2014 | Brokaw 2017 | Philis-Tsimikas 2014 | Lim 2017 | Nicholson 2016 | Rautio 2014 |
| <b>A. Selection (maximum of four stars)</b>                                     |             |               |              |             |                      |          |                |             |
| 1. Representativeness of the exposed cohort                                     | *           | *             | *            | *           | *                    | *        | *              | *           |
| 2. Selection of the non-exposed cohort                                          |             |               |              |             |                      |          |                |             |
| 3. Ascertainment of exposure                                                    |             | *             |              |             | *                    | *        | *              |             |
| 4. Demonstration that outcome of interest was not present at the start of study | *           | *             | *            | *           | *                    | *        | *              | *           |
| <b>B. Comparability (maximum of two stars)</b>                                  |             |               |              |             |                      |          |                |             |
| 1. Comparability of the cohort on the basis of the design or analysis           | *           |               |              | *           | *                    | *        |                |             |
| <b>C. Outcome (maximum of three stars)</b>                                      |             |               |              |             |                      |          |                |             |
| 1. Assessment of outcome                                                        |             |               |              |             | *                    | *        | *              | *           |
| 2. Was follow-up long enough for outcomes to occur                              | *           | *             |              | *           | *                    |          | *              | *           |
| 3. Adequacy of follow-up of cohorts                                             | *           |               |              | *           | *                    | *        | *              |             |
| Total (maximum of nine stars)                                                   | 5           | 4             | 2            | 5           | 7                    | 6        | 6              | 4           |
| The overall quality                                                             | Fair        | Poor          | Poor         | Fair        | Good                 | Fair     | Fair           | Poor        |

Note: \* = Number of stars—Good Quality: 7-8 stars/points; Fair Quality: 5-6 stars /points; Poor Quality: 0 to 4 stars/points

e) Summary of risk of bias in RCT studies

| Randomization process          | Deviations from intended interventions | Missing outcome data          | Measurement of the outcome    | Selection of the reported result | Overall Bias            |
|--------------------------------|----------------------------------------|-------------------------------|-------------------------------|----------------------------------|-------------------------|
| Low= 14                        | Low = 13                               | Low = 20                      | Low = 24                      | Low = 16                         | Low =5<br>Some concerns |
| Some concerns = 13<br>High = 3 | Some concerns = 2<br>High = 14         | Some concerns = 0<br>High = 9 | Some concerns = 4<br>High = 1 | Some concerns = 13<br>High = 0   | = 4<br>High = 21        |

f) Summary of all risk of bias assessment results

| RCT (Risk of bias)                        | Summary<br>Non-RCT (Risk of bias) | Single-arm studies (Quality)    |
|-------------------------------------------|-----------------------------------|---------------------------------|
| Low = 5<br>Some concerns = 4<br>High = 21 | Moderate = 1<br>Serious = 1       | Poor = 3<br>Fair = 4<br>Good =1 |
| <b>Total=30</b>                           | <b>Total =2</b>                   | <b>Total = 8</b>                |

**Table S3. Subgroup analyses of the effect of lifestyle intervention in women with a history of gestational diabetes on incidence of T2DM by PROGRESS<sup>a</sup> framework**

| Analyses                              | Studies | Participants | Relative risk (95% CI) | I <sup>2</sup> | <i>p</i> -value for subgroup difference |
|---------------------------------------|---------|--------------|------------------------|----------------|-----------------------------------------|
| <b>Country</b>                        |         |              |                        |                | 0.56                                    |
| High-income                           | 6       | 848          | 0.69 [ 0.49, 0.96]     | 10.4           |                                         |
| Middle-income                         | 8       | 3220         | 0.79 [ 0.56, 1.11]     | 37.1           |                                         |
| <b>Continent</b>                      |         |              |                        |                | 0.22                                    |
| Asia                                  | 8       | 3220         | 0.79 [ 0.56, 1.11]     | 37.1           |                                         |
| Australia                             | 2       | 227          | 0.97 [ 0.62, 1.53]     | 0.0            |                                         |
| Europe                                | 1       | 237          | 0.65 [ 0.31, 1.35]     | NA             |                                         |
| North America                         | 3       | 384          | 0.51 [ 0.33, 0.79]     | 0.0            |                                         |
| <b>Educational status<sup>b</sup></b> |         |              |                        |                | 0.29                                    |
| Mostly without tertiary education     | 1       | 332          | 0.17 [0.75, 1.85]      | NA             |                                         |
| Mostly with tertiary education        | 6       | 2384         | 0.88 [0.66, 1.18]      | 0.0            |                                         |
| <b>Income level<sup>c</sup></b>       |         |              |                        |                | 0.34                                    |
| Average or above:                     | 2       | 172          | 0.17 [0.02, 1.39]      | 0.0            |                                         |
| Below average                         | 3       | 611          | 0.261[0.13, 2.83]      | 0.0            |                                         |

<sup>a</sup> PROGRESS (Place of Residence, Race/ethnicity/culture/language, Occupation, Gender/sex, Religion, Education, Socioeconomic status, and Social)

<sup>b</sup> Only seven studies reported educational status.

<sup>c</sup> Mean income level for the country during the same year in which the study was conducted was taken as a cut-off point; NA: Not applicable.

**Note:** Subgroup analysis for ethnicity, gender, religion and social capital could not be performed (Ethnicity: studies that report on ethnicity included a range of mixed ethnicity and were not mutually exclusive. Religion and social capital: not reported; Gender NA). No studies were from low-income countries, Africa, South America, or the Pacific.

**Table S4. Subgroup analyses of the effect of lifestyle intervention in women with a history of gestational diabetes on bodyweight by PROGRESS<sup>a</sup> framework**

| Analyses                              | Studies | Participants | Mean difference, kg (95% CI) | I <sup>2</sup> | p-value for subgroup difference |
|---------------------------------------|---------|--------------|------------------------------|----------------|---------------------------------|
| <b>Place of residence</b>             |         |              |                              |                |                                 |
| <b>Country</b>                        |         |              |                              |                | 0.04                            |
| High-income                           | 15      | 2779         | -1.46 [ -2.27, -0.66]        | 70.46          |                                 |
| Middle-income                         | 6       | 2610         | -0.11[ -1.12, 0.89]          | 69.31          |                                 |
| <b>Continent</b>                      |         |              |                              |                | 0.49                            |
| Asia                                  | 8       | 2833         | -0.31[ -1.31, 0.69]          | 63.49          |                                 |
| Australia                             | 7       | 622          | -1.23[ -2.17, -0.30]         | 49.90          |                                 |
| Europe                                | 2       | 81           | -1.97[ -7.22, 3.28]          | 79.35          |                                 |
| North America                         | 4       | 1853         | -1.46[ -3.17, 0.24]          | 82.87          |                                 |
| <b>Educational status<sup>b</sup></b> |         |              |                              |                | 0.91                            |
| Mostly without tertiary education     | 2       | 402          | -0.94[-3.86, 1.98]           | 0.0            |                                 |
| Mostly with tertiary education        | 11      | 2959         | -1.11[-2.15, -0.07]          | 87.57          |                                 |
| <b>Ethnicity<sup>c</sup></b>          |         |              |                              |                | 0.11                            |
| East Asian                            | 4       | 753          | -0.43[ -2.07, 1.22]          | 88.42          |                                 |
| Middle Eastern                        | 1       | 104          | -3.57[-9.80, -2.66]          | NA             |                                 |
| South Asian                           | 1       | 1601         | 0.00 [ -1.74, 1.74]          | NA             |                                 |
| White                                 | 2       | 133          | -2.34[ -3.66, -1.02]         | 38.81          |                                 |
| <b>Income level<sup>d</sup></b>       | 4       |              |                              |                | 0.11                            |
| Average or above:                     | 5       | 677          | -1.83[-2.94, -0.73]          | 72.91          |                                 |
| Below average                         | 3       | 664          | -0.07[-1.93, 1.80]           | 89.99          |                                 |

<sup>a</sup> PROGRESS (Place of Residence, Race/ethnicity/culture/language, Occupation, Gender/sex, Religion, Education, Socioeconomic status, and Social)

<sup>b</sup> Thirteen studies reported educational status.

<sup>c</sup>Studies that did not report on ethnicity and those with mixed ethnicity were excluded. East Asian: three studies from China and one from South Korea. White: two from Ireland and two from Australia. South Asian: from India and Middle Eastern from Israel, including Jews and Bedouins.

<sup>d</sup> Mean income level for the country during the same year in which the study was conducted was taken as a cut-off point; Not applicable.

**Note:** subgroup analysis for gender, religion and social capital, could not be performed (Religion and social capital: not reported; Gender NA). There were no studies from low-income country, Africa, South America or the Pacific.



**Table S5. Subgroup analyses of the effect of lifestyle intervention in women with a history of gestational diabetes on BMI by PROGRESS<sup>a</sup> framework**

| Analyses                              | Studies | Participants | Mean difference, kg<br>(95% CI) | I <sup>2</sup> | p-value for<br>subgroup<br>difference |
|---------------------------------------|---------|--------------|---------------------------------|----------------|---------------------------------------|
| <b>Country</b>                        |         |              |                                 |                | 0.28                                  |
| High-income                           | 10      | 527          | -0.60[ -1.07, -0.13]            | 42.06          |                                       |
| Middle-income                         | 5       | 1059         | 0.26[ -1.23, 1.75]              | 98.90          |                                       |
| <b>Continent</b>                      |         |              |                                 |                | 0.91                                  |
| Asia                                  | 6       | 1163         | 0.02[ -1.38, 1.42]              | 98.66          |                                       |
| Australia                             | 4       | 129          | -0.44[ -1.13, 0.25]             | 34.14          |                                       |
| Europe                                | 2       | 80           | -0.67[ -2.52, 1.18]             | 75.69          |                                       |
| North America                         | 3       | 214          | -0.55[ -1.59, 0.48]             | 68.78          |                                       |
| <b>Educational status<sup>b</sup></b> |         |              |                                 |                | 0.31                                  |
| Mostly without tertiary<br>education  | 1       | 104          | -1.61[ -3.87, 0.65]             | NA             |                                       |
| Mostly with tertiary<br>education     | 8       | 1189         | -0.40[ -1.00, 0.21]             | 88.87          |                                       |
| <b>Ethnicity<sup>c</sup></b>          |         |              |                                 |                | 0.19                                  |
| East Asian                            | 4       | 982          | 0.65[ -0.95, -2.25]             | 99.15          |                                       |
| Middle Eastern                        | 1       | 104          | -1.61[ -3.87, 0.65]             | NA             |                                       |
| White                                 | 3       | 103          | -0.79[ -1.66, -0.07]            | 0.0            |                                       |
| <b>Income level<sup>d</sup></b>       |         |              |                                 |                | 0.64                                  |
| Average or above:                     | 4       | 1041         | -0.48[ -1.16, 0.19]             | 58.07          |                                       |
| Below average                         | 3       | 312          | -0.14[ -1.44, 1.16]             | 91.35          |                                       |

<sup>a</sup> PROGRESS (Place of Residence, Race/ethnicity/culture/language, Occupation, Gender/sex, Religion, Education, Socioeconomic status, and Social)

<sup>b</sup> Eight studies reported educational status.

<sup>c</sup>Studies that did not report on ethnicity and those with mixed ethnicity were excluded. East Asian: All from China. White: two from Ireland and one from Australia. Middle Eastern from Israel, including Jews and Bedouins.

<sup>d</sup> Mean income level for the country during the same year in which the study was conducted was taken as a cut-off point; Not applicable.

**Note:** subgroup analysis for gender, religion and social capital, could not be performed (Religion and social capital: not reported; Gender NA). There was no study from low-income country, Africa, South America or the Pacific.

Figure S1. Funnel plots for publication bias of studies testing the effect of lifestyle intervention on Type 2 diabetes and body weight

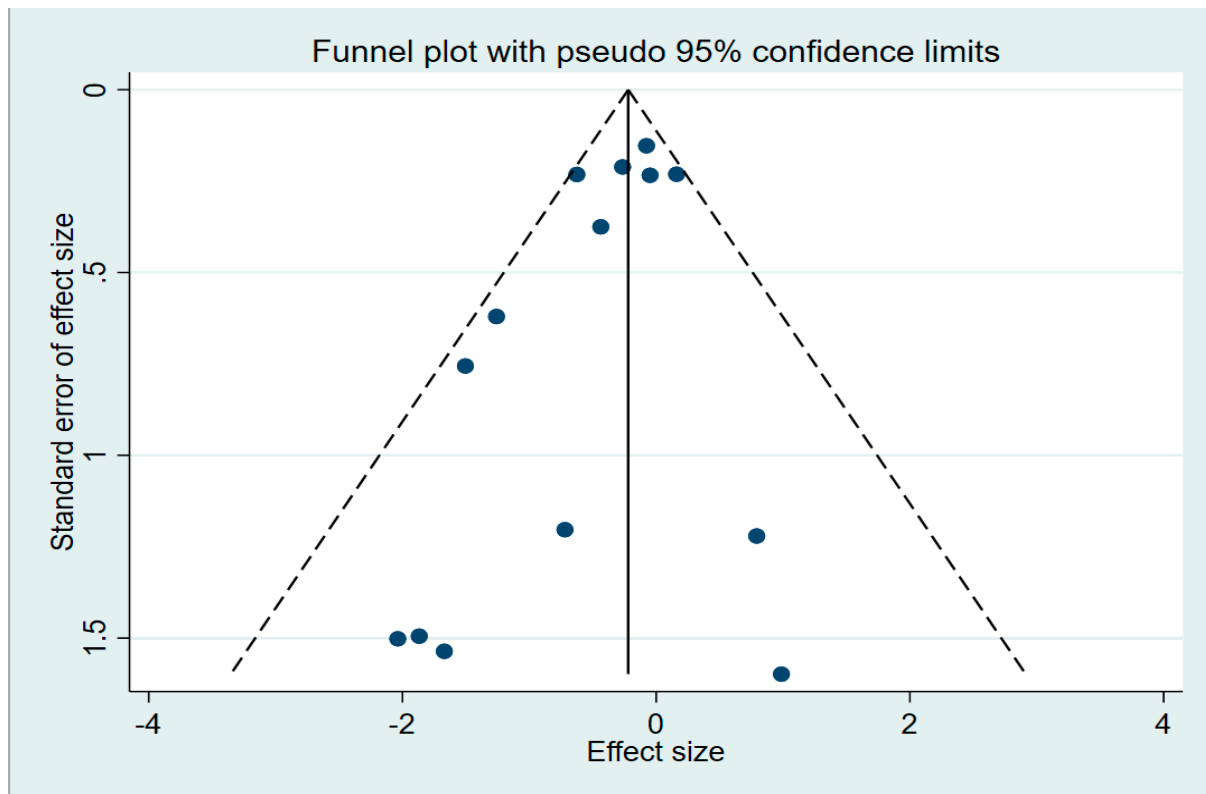

A) Type 2 diabetes: Egger's test  $P = 0.090$

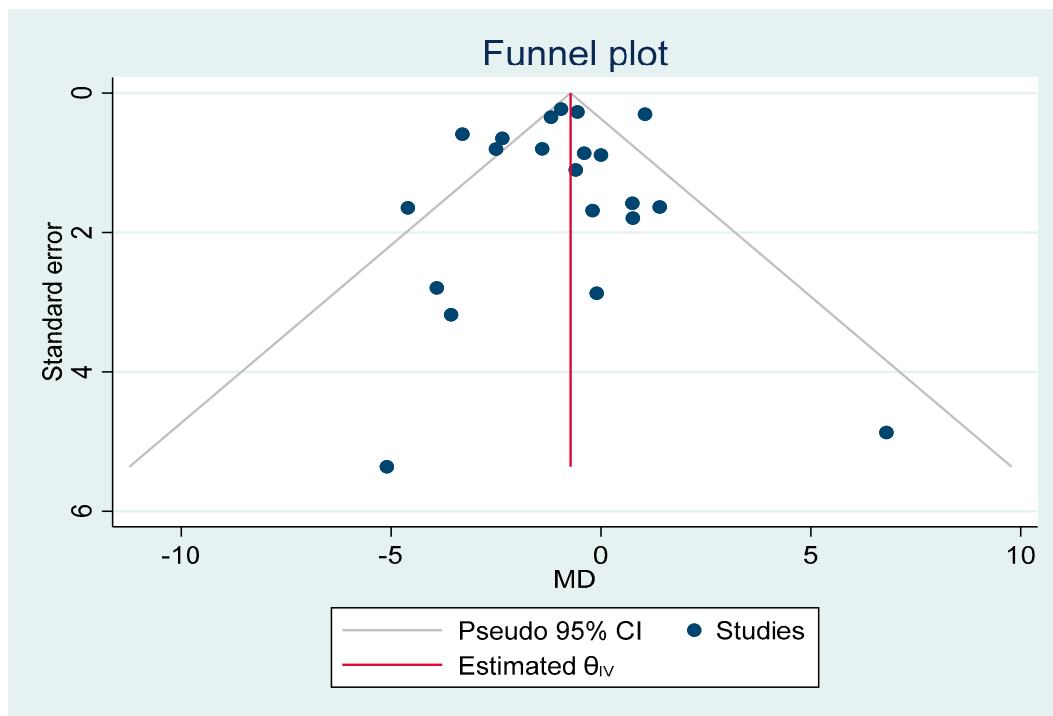

B) Body weight: Egger's test  $P = 0.995$   
**Figure S2. Forest plots**

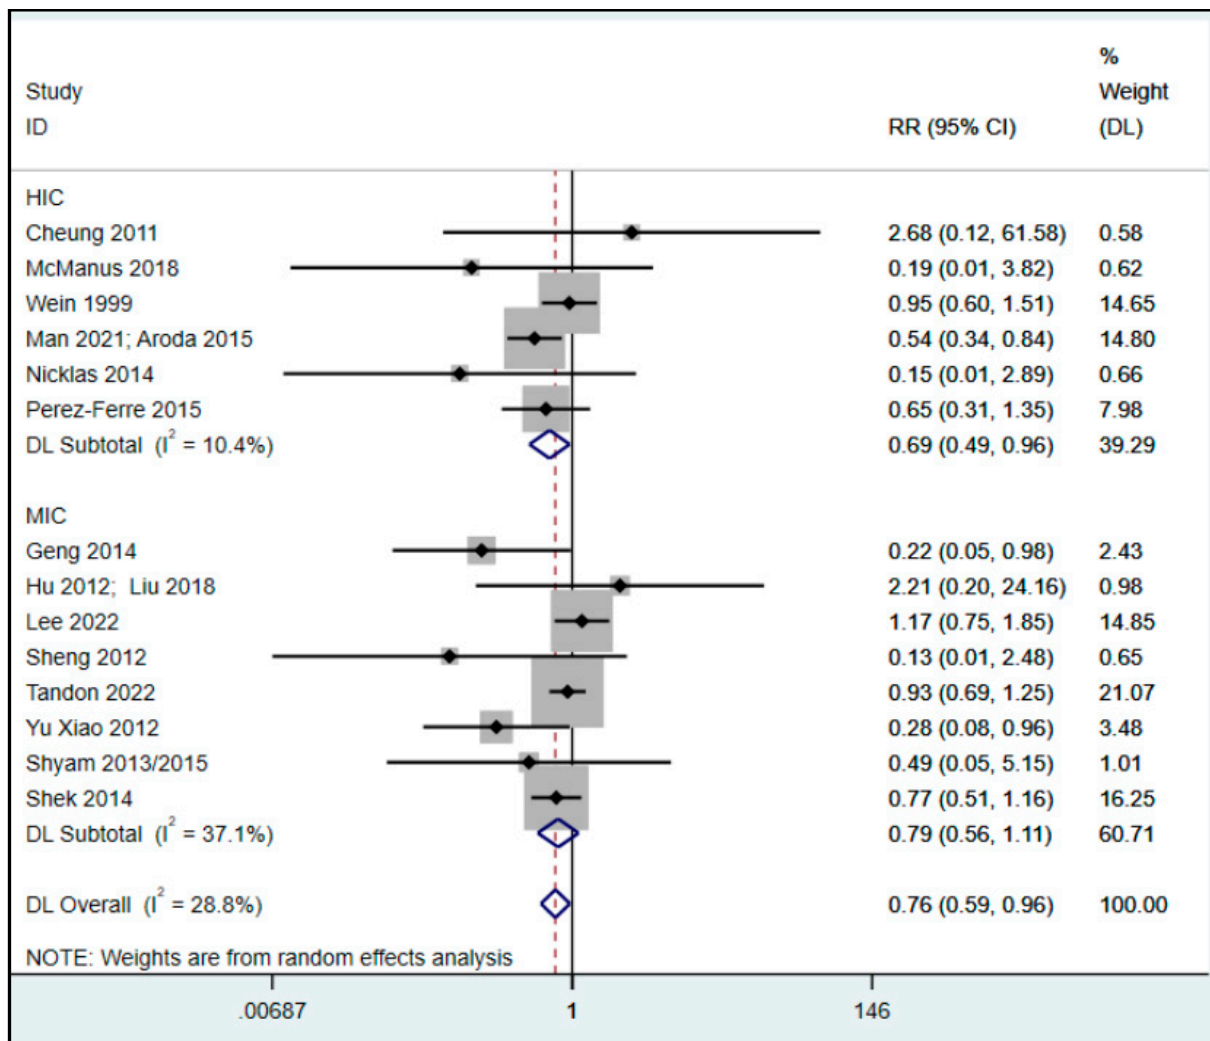

Figure S2.1. The effect of lifestyle intervention on T2DM by country according to the World Bank classification (subgroup differences: p-value=0.556)[35, 38, 47, 49, 51, 52, 58, 65, 72, 74-79].

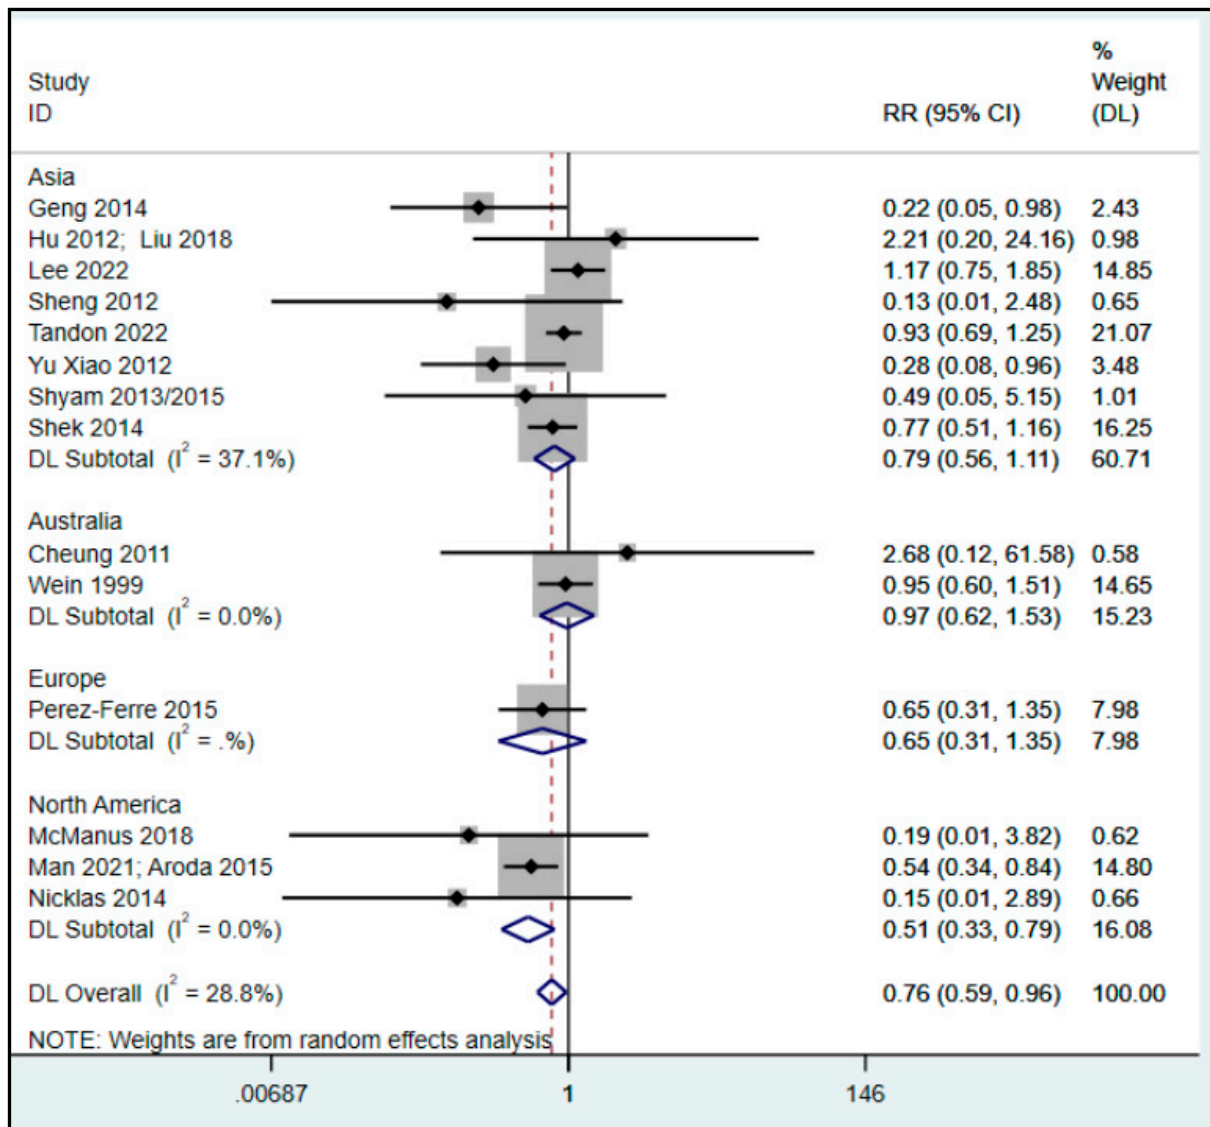

Figure S2.2. The effect of lifestyle intervention on T2DM by continent (subgroup differences: p-value=0.219) [35, 38, 47, 49, 51, 52, 58, 65, 72, 74-79].

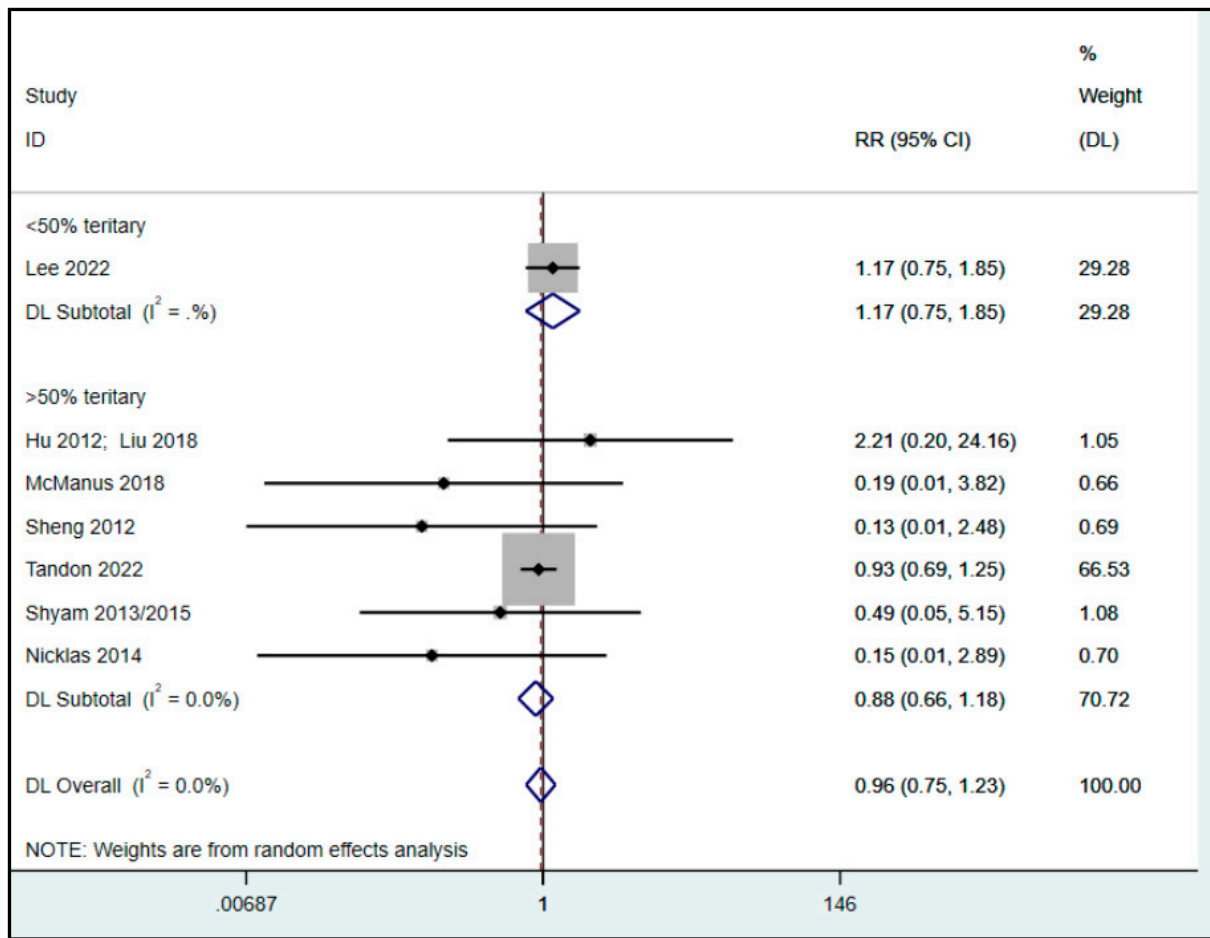

Figure S2.3. The effect of lifestyle intervention on T2DM by educational status. (subgroup differences: p-value=0.298) [35, 38, 51, 52, 61, 65, 75-77].

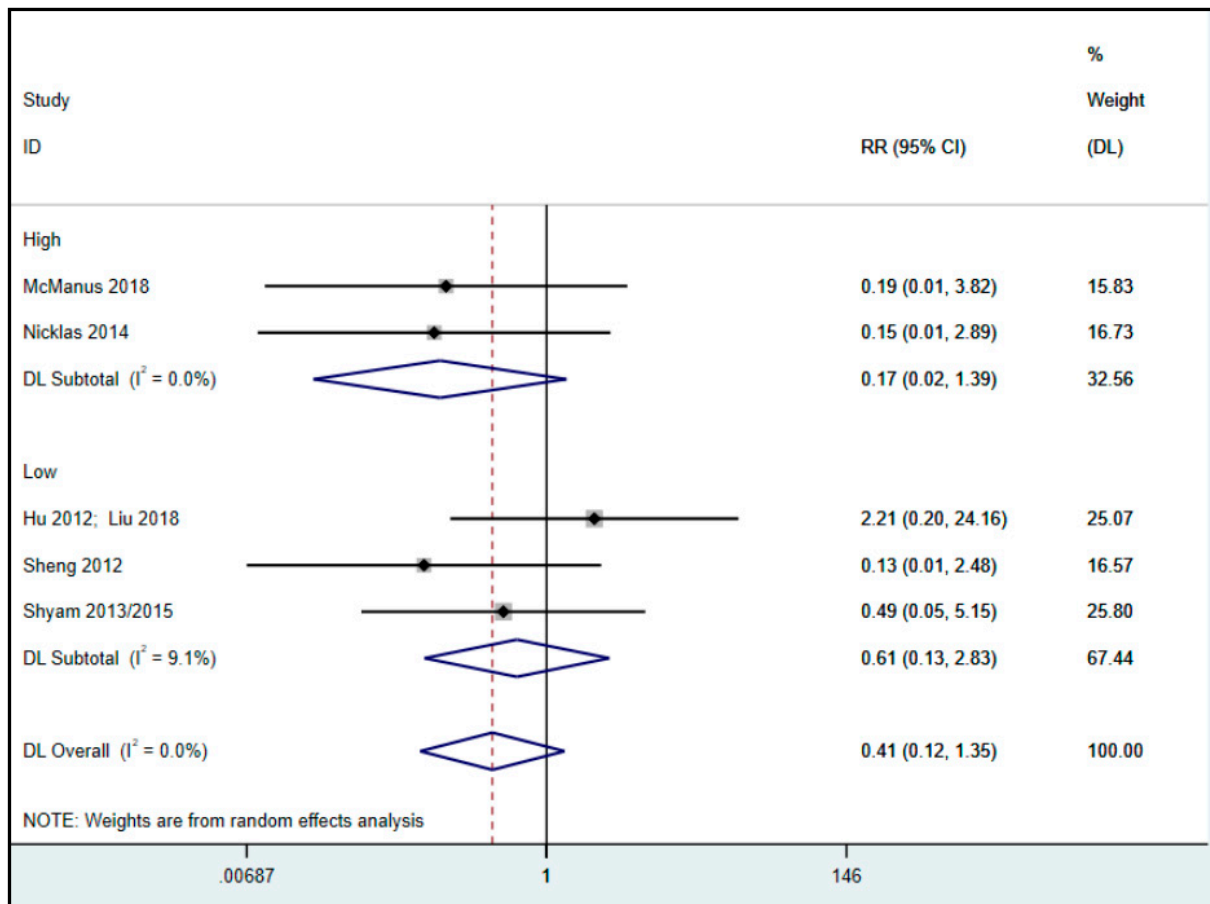

Figure S2.4. The effect of lifestyle intervention on T2DM by income. (subgroup differences: p-value=0.336) [35, 38, 51, 52, 61, 65, 75-77].

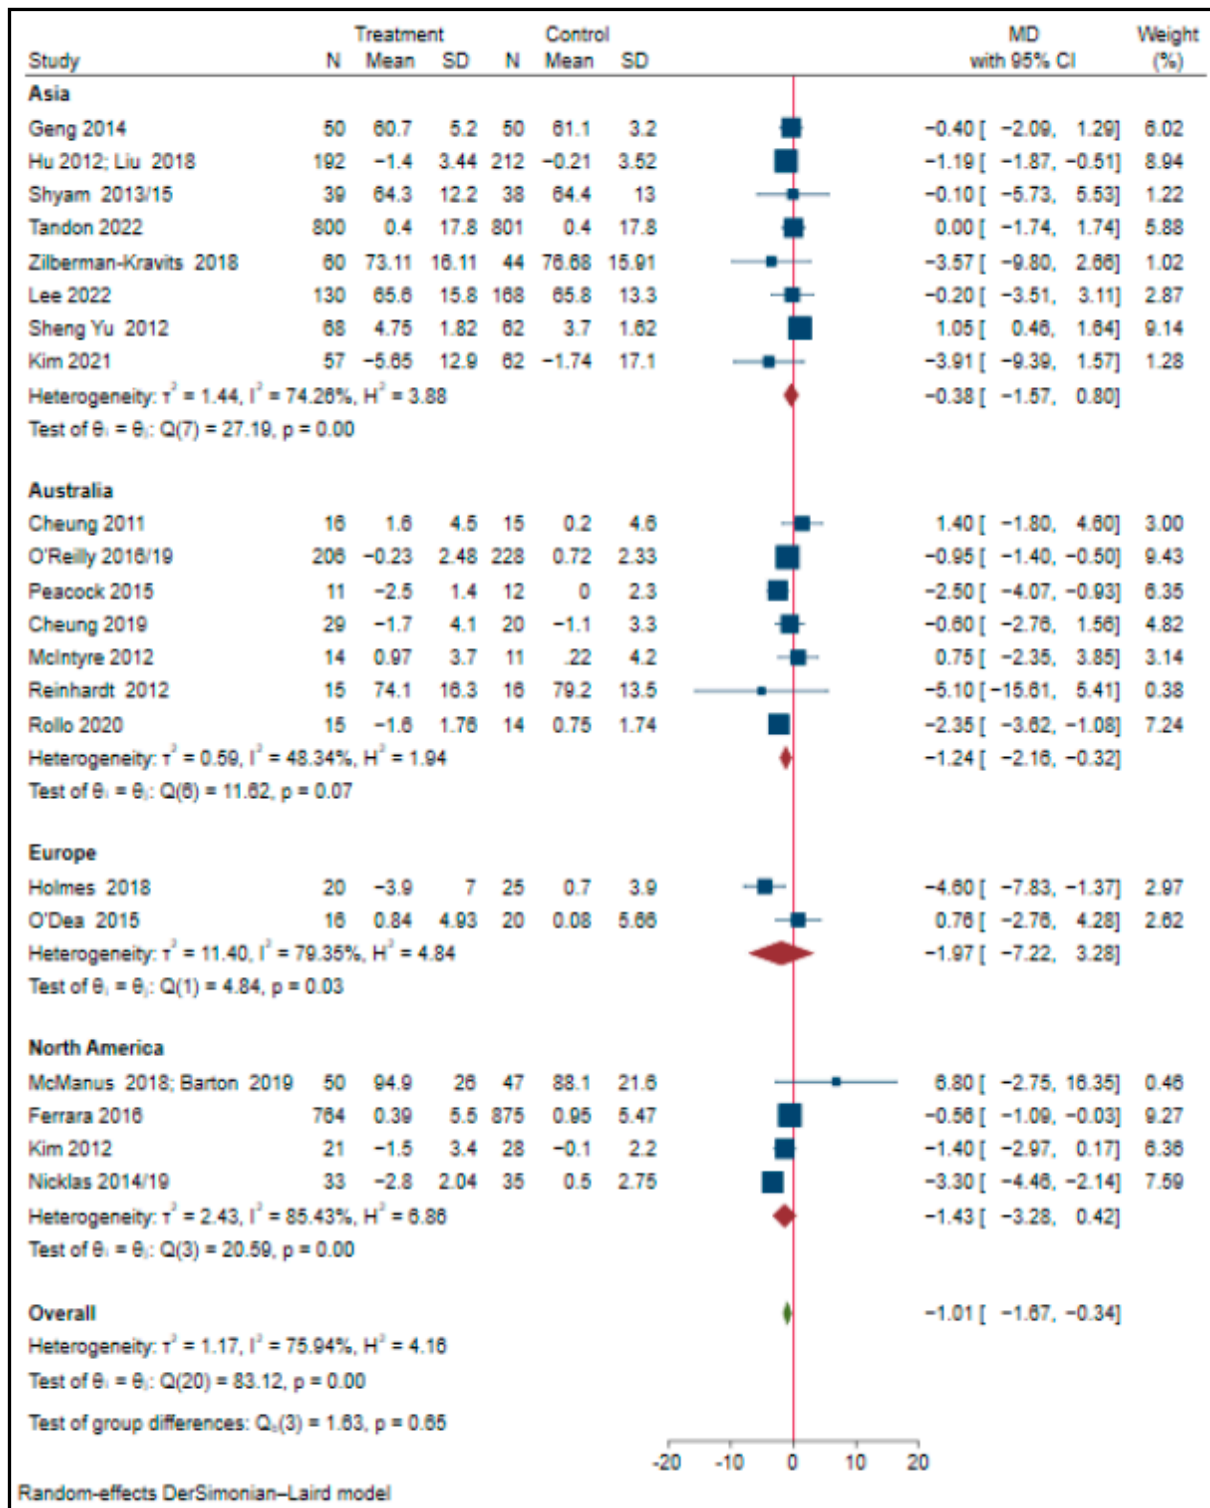

Figure S2.5. The effect of lifestyle intervention on body weight by continent [29, 32, 33, 35, 38, 44, 49-54, 58, 60, 61, 63-65, 68, 69, 71, 75-77, 80].



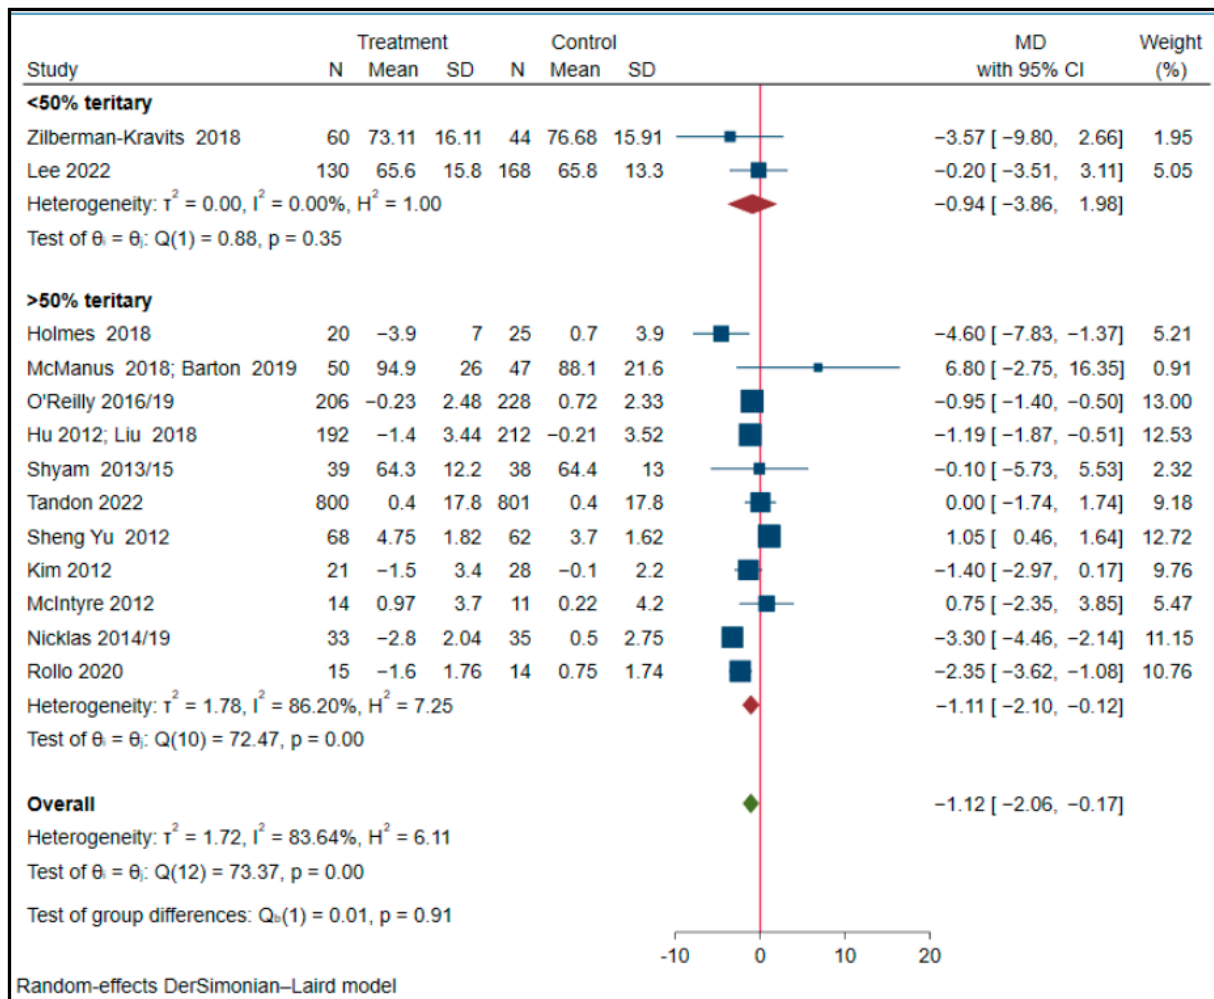

Figure S2.6. The effect of lifestyle intervention on body weight by educational status [29, 33, 35, 38, 50-52, 61, 63, 65, 68, 69, 71, 75-77, 80].

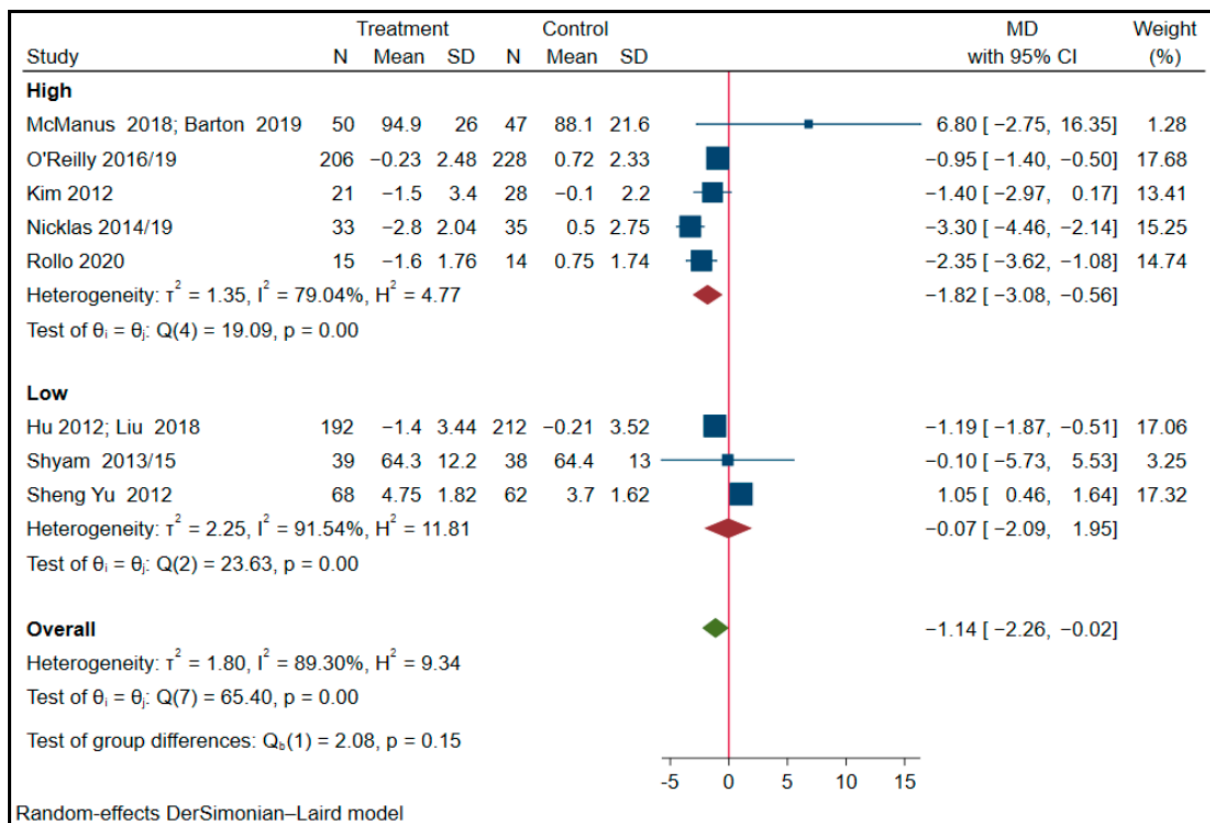

Figure S2.7. The effect of lifestyle intervention on body weight by income [29, 33, 35, 51, 52, 61, 63, 69, 71, 75-77].

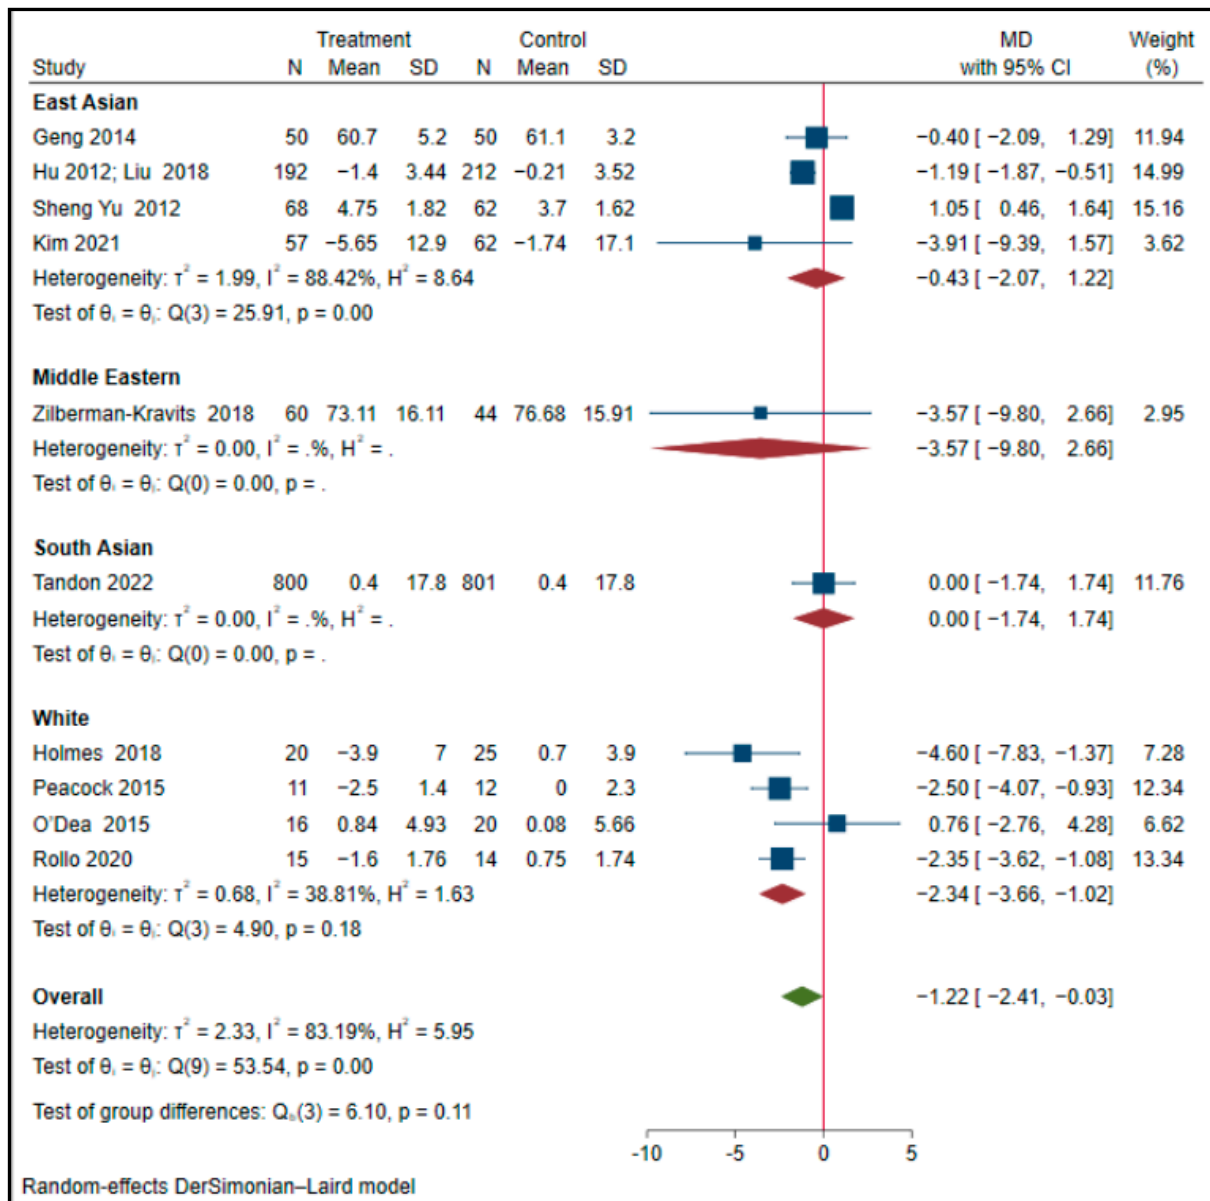

Figure S2.8. The effect of lifestyle intervention on body weight by ethnicity (Studies with mixed ethnicity and those with unknown ethnicity were excluded) [29, 35, 38, 49, 50, 53, 54, 61, 64, 75, 80].

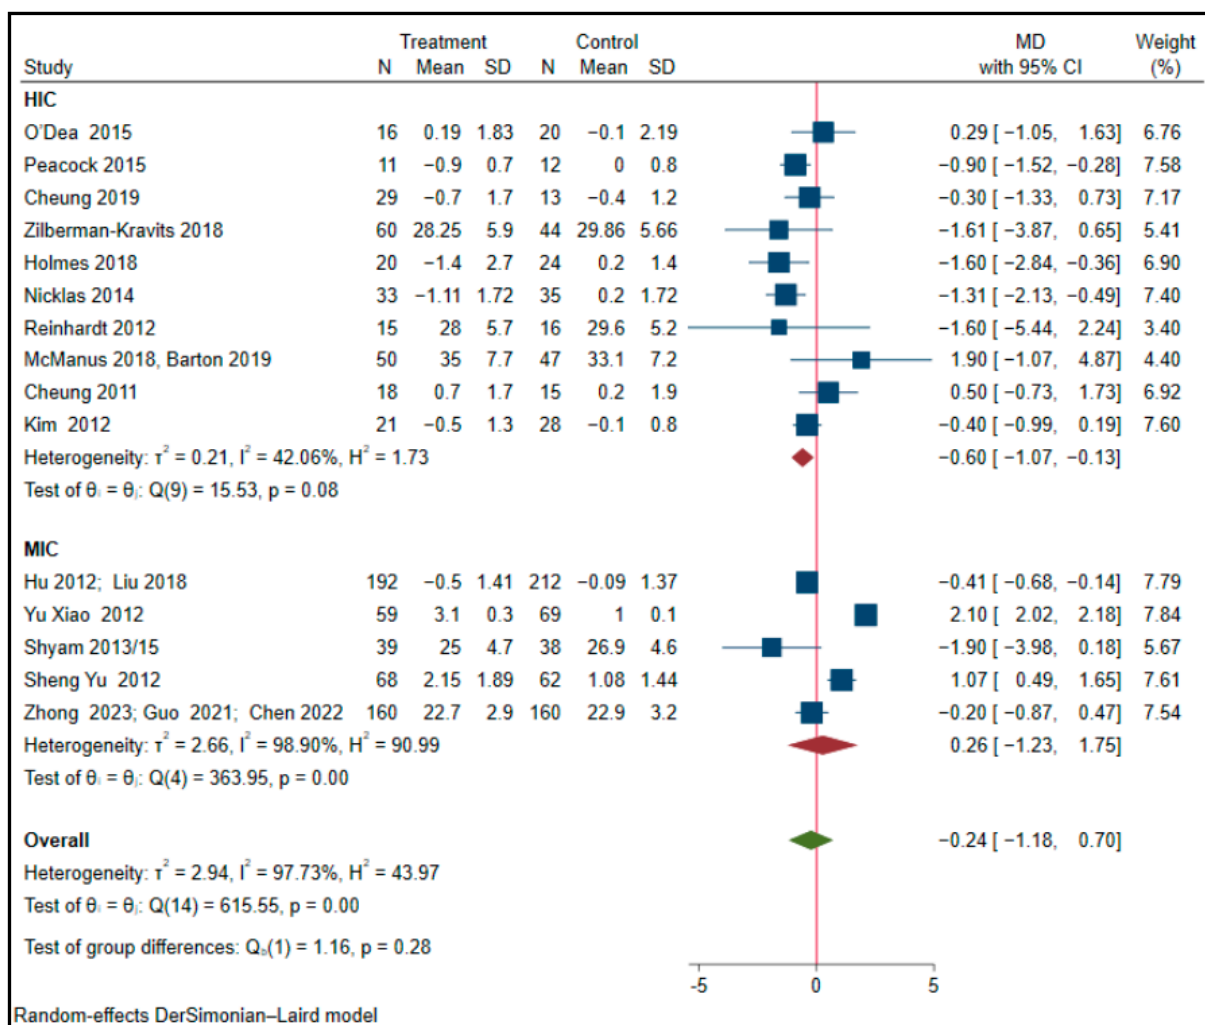

Figure S2.9. The effect of lifestyle intervention on BMI by country income classification according to the World Bank [32, 35, 43-46, 50-54, 58, 61, 63, 69, 75-77, 79, 80].

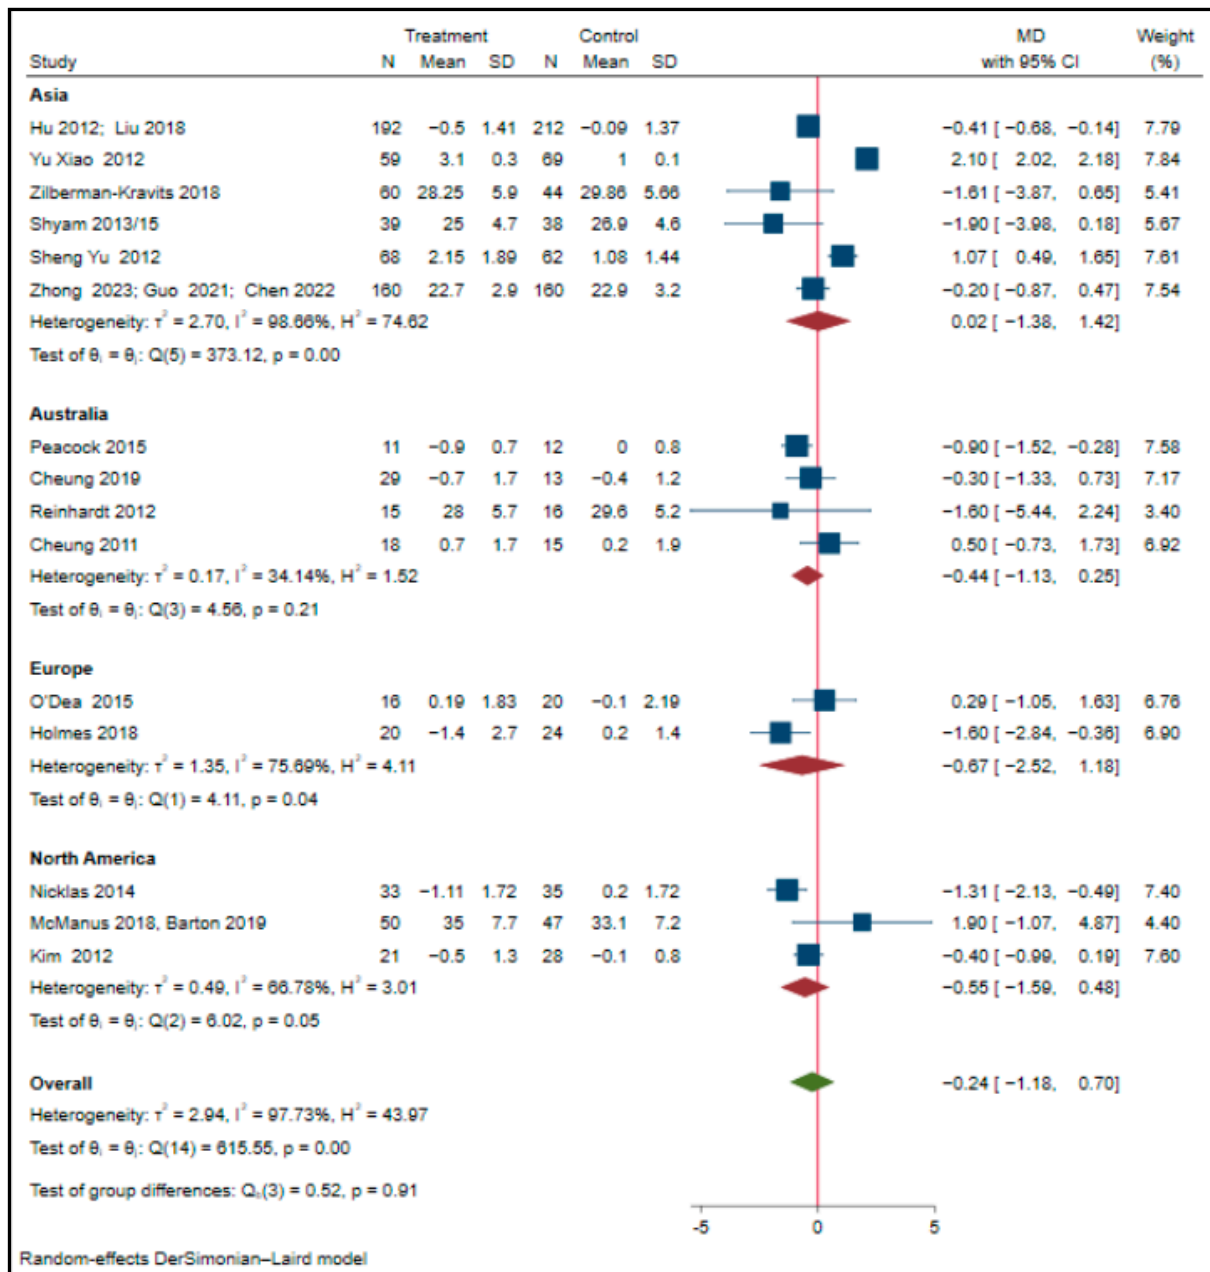

Figure S2.10. The effect of lifestyle intervention on BMI by continent [29, 32, 33, 35, 38, 44, 49-54, 58, 60, 61, 63-65, 68, 71, 75-77, 80].

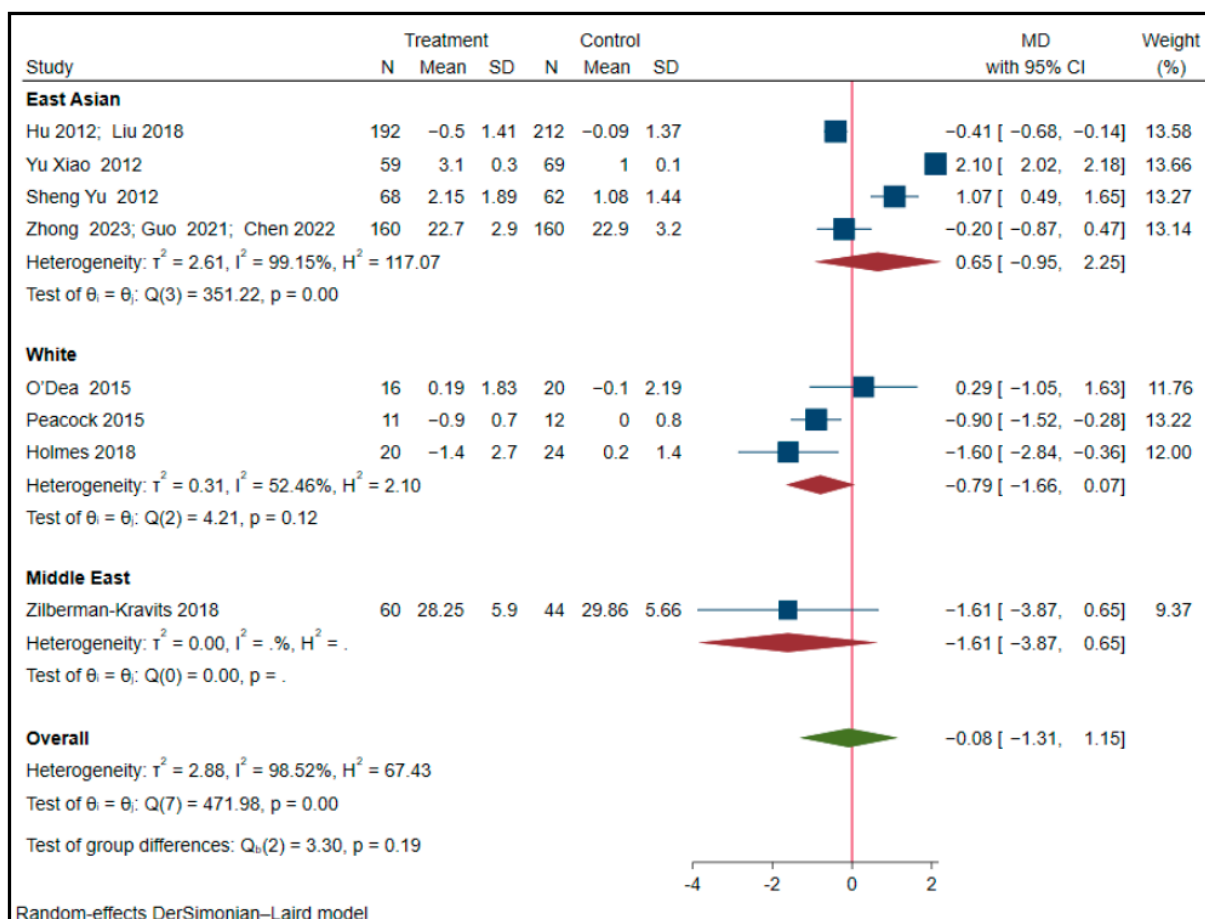

Figure S2.11. The effect of lifestyle intervention on BMI by ethnicity (Studies with mixed ethnicity and those with unknown ethnicity were excluded) [35, 43, 45, 46, 50, 53, 54, 61, 75, 79, 80].

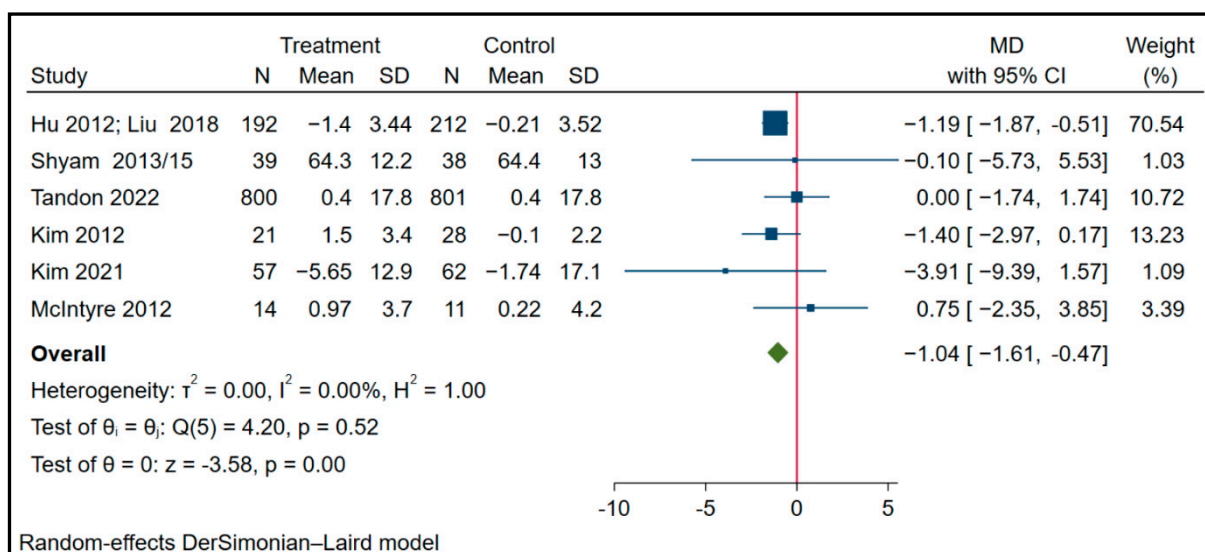

Figure S2.12 Sensitivity analysis (The effect of lifestyle intervention on body weight after excluding studies with a high risk of bias [35, 38, 61, 63, 64, 68, 76, 77].

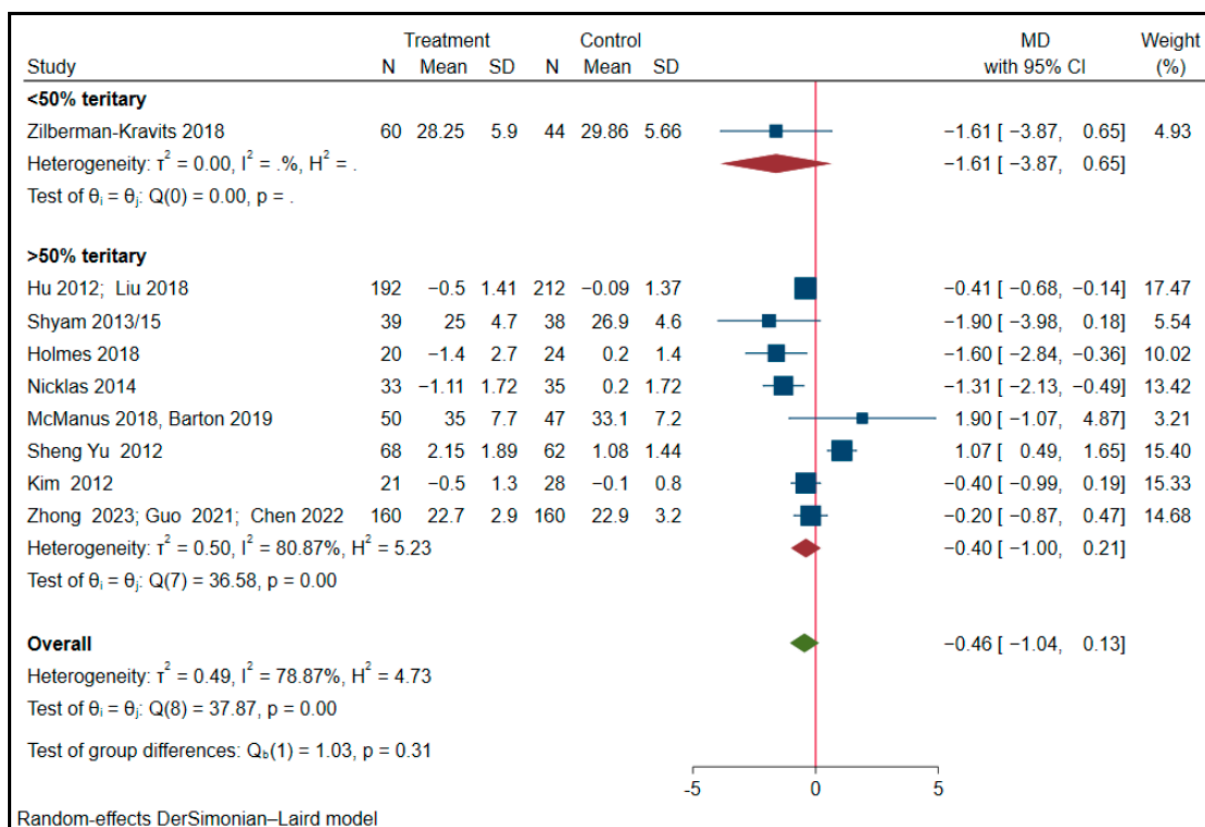

Figure S2.13. The effect of lifestyle intervention on BMI by educational status [35, 43, 45, 46, 50-52, 61, 63, 69, 75-77, 80]

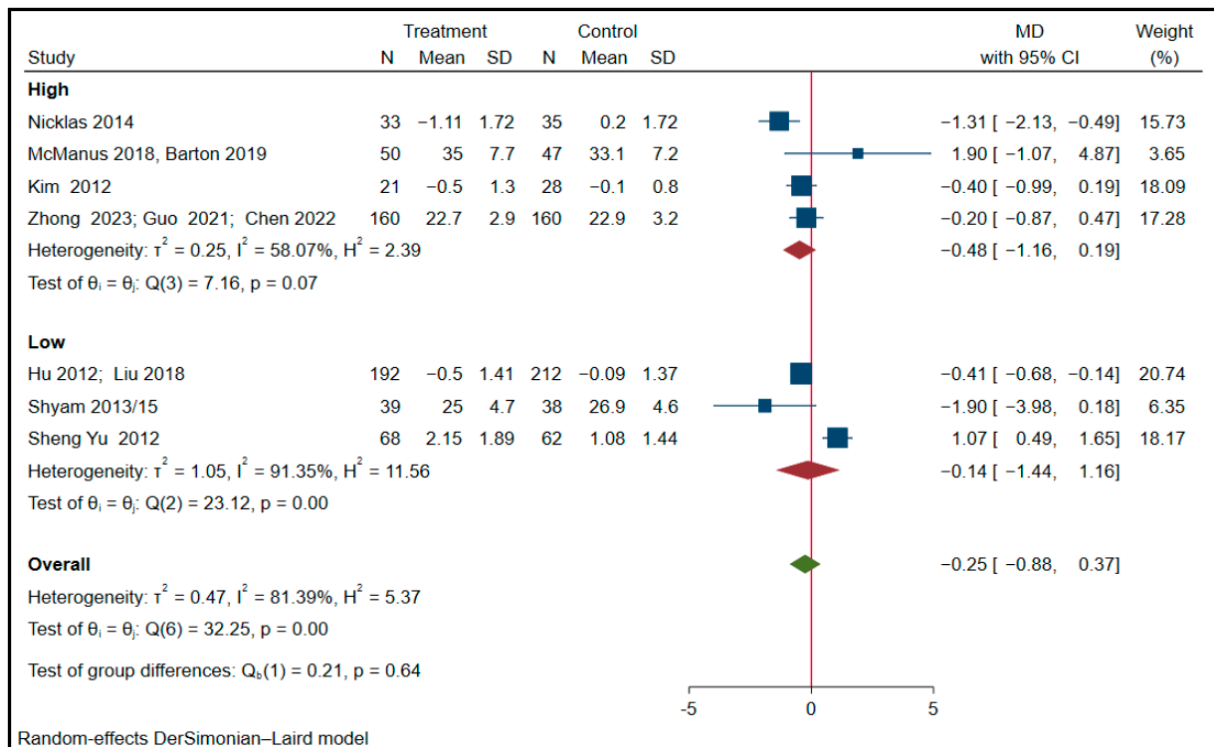

Figure S2.14. The effect of lifestyle intervention on BMI by income [35, 43, 45, 46, 51, 52, 61, 63, 69, 75-77]



## References:

1. Hill-Briggs, F.; Adler, N.E.; Berkowitz, S.A.; Chin, M.H.; Gary-Webb, T.L.; Navas-Acien, A.; Thornton, P.L.; Haire-Joshu, D. Social determinants of health and diabetes: A scientific review. *Diabetes Care* **2021**, *44*, 258–279.
2. IDF. *Diabetes Atlas*, 10th ed.; IDF: Springfield, MO, USA, 2021.
3. Sommer, I.; Griebler, U.; Mahlknecht, P.; Thaler, K.; Bouskill, K.; Gartlehner, G.; Mendis, S. Socioeconomic inequalities in non-communicable diseases and their risk factors: An overview of systematic reviews. *BMC Public Health* **2015**, *15*, 914.
4. Agardh, E.; Allebeck, P.; Hallqvist, J.; Moradi, T.; Sidorchuk, A. Type 2 diabetes incidence and socio-economic position: A systematic review and meta-analysis. *Int. J. Epidemiol.* **2011**, *40*, 804–818.
5. Peykari, N.; Djalalinia, S.; Qorbani, M.; Sobhani, S.; Farzadfar, F.; Larijani, B. Socioeconomic inequalities and diabetes: A systematic review from Iran. *J. Diabetes Metab. Disord.* **2015**, *14*, 8.
6. Maty, S.C.; Everson-Rose, S.A.; Haan, M.N.; Raghunathan, T.E.; Kaplan, G.A. Education, income, occupation, and the 34-year incidence (1965–99) of type 2 diabetes in the Alameda County Study. *Int. J. Epidemiol.* **2005**, *34*, 1274–1281.
7. Tung, E.L.; Baig, A.A.; Huang, E.S.; Laiteerapong, N.; Chua, K.-P. Racial and ethnic disparities in diabetes screening between Asian Americans and other adults: BRFSS 2012–2014. *J. Gen. Intern. Med.* **2017**, *32*, 423–429.
8. Wang, H.; Li, N.; Chivese, T.; Werfalli, M.; Sun, H.; Yuen, L.; Hoegfeldt, C.A.; Powe, C.C.; Immanuel, J.; Karuranga, S.; et al. IDF diabetes atlas: Estimation of global and regional gestational diabetes mellitus prevalence for 2021 by International Association of Diabetes in Pregnancy Study Group's Criteria. *Diabetes Res. Clin. Pract.* **2022**, *183*, 109050.
9. Yuen, L.; Wong, V.W. Gestational diabetes mellitus: Challenges for different ethnic groups. *World J. Diabetes* **2015**, *6*, 1024.
10. Shah, N.S.; Wang, M.C.; Freaney, P.M.; Perak, A.M.; Carnethon, M.R.; Kandula, N.R.; Gunderson, E.P.; Bullard, K.M.; Grobman, W.A.; O'Brien, M.J.; et al. Trends in gestational diabetes at first live birth by race and ethnicity in the US, 2011–2019. *JAMA* **2021**, *326*, 660–669.
11. Vounzoulaki, E.; Khunti, K.; Abner, S.C.; Tan, B.K.; Davies, M.J.; Gillies, C.L. Progression to type 2 diabetes in women with a known history of gestational diabetes: Systematic review and meta-analysis. *BMJ* **2020**, *369*, m1361.
12. CDC. NCHHSTP. social determinants of health. Retrieved March **2014**, *8*, 2016.
13. Currie, C.; Zanotti, C.; Morgan, A.; Currie, D.; De Looze, M.; Roberts, C.; Samdal, O.; Smith, O.R.F.; Barnekow, V. Social determinants of health and well-being among young people. *Health Behav. Sch.-Aged Child. (HBSC) Study Int. Rep.* **2009**, *2010*, 271.
14. Braveman, P.; Gottlieb, L. The social determinants of health: it's time to consider the causes of the causes. *Public Health Rep.* **2014**, *129* (Suppl. 2), 19–31.
15. Girgis, C.M.; Gunton, J.E.; Cheung, N.W. The influence of ethnicity on the development of type 2 diabetes mellitus in women with gestational diabetes: A prospective study and review of the literature. *Int. Sch. Res. Not.* **2012**, *2012*, 341638.
16. Marmot, M.; Friel, S.; Bell, R.; Houweling, T.A.; Taylor, S.; on behalf of the Commission on Social Determinants of Health. Closing the gap in a generation: Health equity through action on the social determinants of health. *Lancet* **2008**, *372*, 1661–1669.
17. Lorenc, T.; Petticrew, M.; Welch, V.; Tugwell, P. What types of interventions generate inequalities? Evidence from systematic reviews. *J. Epidemiol. Community Health* **2013**, *67*, 190–193.
18. Chapman, A.R.; Carbonetti, B. Human rights protections for vulnerable and disadvantaged groups: The contributions of the UN Committee on Economic, Social and Cultural Rights. *Hum. Rights Q.* **2011**, *33*, 682.
19. Hart, J.T. The inverse care law. *Lancet* **1971**, *297*, 405–412.
20. Gordon, D.; Shaw, M. *Inequalities in Health: The Evidence Presented to the Independent Inquiry into Inequalities in Health, Chaired by Sir Donald Acheson*; Policy Press: Bristol, UK, 1999.
21. Chatzi, G.; Whittaker, W.; Chandola, T.; Mason, T.; Soiland-Reyes, C.; Sutton, M.; Bower, P. Diabetes Prevention Programme and socioeconomic inequalities in Type 2 Diabetes in England: Georgia Chatzi. *Eur. J. Public Health* **2022**, *32* (Suppl. 3), ckac129–ckac159.
22. Welch, V.A.; Petkovic, J.; Jull, J.; Hartling, L.; Klassen, T.; Kristjansson, E.; Pardo, J.P.; Petticrew, M.; Stott, D.J.; Thomson, D.; et al. Equity and specific populations. In *Cochrane Handbook for Systematic Reviews of Interventions*; John Wiley and Sons: Hoboken, NJ, USA, 2019; pp. 433–449.
23. O'Neill, J.; Tabish, H.; Welch, V.; Petticrew, M.; Pottie, K.; Clarke, M.; Evans, T.; Pardo, J.P.; Waters, E.; White, H.; et al. Applying an equity lens to interventions: Using PROGRESS ensures consideration of socially stratifying factors to illuminate inequities in health. *J. Clin. Epidemiol.* **2014**, *67*, 56–64.

24. Page, M.J.; McKenzie, J.E.; Bossuyt, P.M.; Boutron, I.; Hoffmann, T.C.; Mulrow, C.D.; Shamseer, L.; Tetzlaff, J.M.; Akl, E.A.; Brennan, S.E.; et al. The PRISMA 2020 statement: An updated guideline for reporting systematic reviews. *Syst. Rev.* **2021**, *10*, 89.
25. Sterne, J.A.; Savović, J.; Page, M.J.; Elbers, R.G.; Blencowe, N.S.; Boutron, I.; Cates, C.J.; Cheng, H.Y.; Corbett, M.S.; Eldridge, S.M.; et al. RoB 2: A revised tool for assessing risk of bias in randomised trials. *BMJ* **2019**, *366*, 14898.
26. Sterne, J.A.; Hernán, M.A.; Reeves, B.C.; Savović, J.; Berkman, N.D.; Viswanathan, M.; Henry, D.; Altman, D.G.; Ansari, M.T.; Boutron, I.; et al. ROBINS-I: A tool for assessing risk of bias in non-randomised studies of interventions. *BMJ* **2016**, *355*, i4919.
27. Peterson, J.; Welch, V.; Losos, M.; Tugwell, P. The Newcastle-Ottawa scale (NOS) for assessing the quality of nonrandomised studies in meta-analyses. *Ott. Ott. Hosp. Res. Inst.* **2011**, *2*, 1–12.
28. Fantom, N.J.; Serajuddin, U. *The World Bank's Classification of Countries by Income*; World Bank Policy Research Working Paper; World Bank Group: Washington, DC, USA, 2016; p. 7528.
29. Rollo, M.E.; Baldwin, J.N.; Hutchesson, M.; Aguiar, E.J.; Wynne, K.; Young, A.; Callister, R.; Haslam, R.; Clare E Collins, C.E. The feasibility and preliminary efficacy of an eHealth lifestyle program in women with recent gestational diabetes mellitus: A pilot study. *Int. J. Environ. Res. Public Health* **2020**, *17*, 7115.
30. McCurley, J.L.; Fortmann, A.L.; Gutierrez, A.P.; Gonzalez, P.; Euyoque, J.; Clark, T.; Preciado, J.; Ahmad, A.; Philis-Tsimikas, A.; Gallo, L.C. Pilot test of a culturally appropriate diabetes prevention intervention for at-risk Latina women. *Diabetes Educ.* **2017**, *43*, 631–640.
31. Philis-Tsimikas, A.; Fortmann, A.L.; Dharkar-Surber, S.; Euyoque, J.A.; Ruiz, M.; Schultz, J.; Gallo, L.C. Dulce Mothers: An intervention to reduce diabetes and cardiovascular risk in Latinas after gestational diabetes. *Transl. Behav. Med.* **2014**, *4*, 18–25.
32. Cheung, N.W.; Blumenthal, C.; Smith, B.J.; Hogan, R.; Thiagalingam, A.; Redfern, J.; Barry, T.; Cinnadaio, N.; Chow, C.K. A pilot randomised controlled trial of a text messaging intervention with customisation using linked data from wireless wearable activity monitors to improve risk factors following gestational diabetes. *Nutrients* **2019**, *11*, 590.
33. O'Reilly, S.L.; Dunbar, J.A.; Versace, V.; Janus, E.; Best, J.D.; Carter, R.; Oats, J.J.N.; Skinner, T.; Ackland, M.; Phillips, P.A.; et al. Mothers after Gestational Diabetes in Australia (MAGDA): A randomised controlled trial of a postnatal diabetes prevention program. *PLoS Med.* **2016**, *13*, e1002092.
34. Chen, M.; Ukke, G.G.; Moran, L.J.; Sood, S.; Bennett, C.J.; Bahri Khomami, M.; Absetz, P.; Teede, H.; Harrison, C.L.; Lim, S. The effect of lifestyle intervention on diabetes prevention by ethnicity: A systematic review of intervention characteristics using the tidier framework. *Nutrients* **2021**, *13*, 4118.
35. Hu, G.; Tian, H.; Zhang, F.; Liu, H.; Zhang, C.; Zhang, S.; Wang, L.; Liu, G.; Yu, Z.; Yang, X.; et al. Tianjin Gestational Diabetes Mellitus Prevention Program: Study design, methods, and 1-year interim report on the feasibility of lifestyle intervention program. *Diabetes Res. Clin. Pract.* **2012**, *98*, 508–517.
36. Higgins, J.P.; Thompson, S.G.; Deeks, J.J.; Altman, D.G. Measuring inconsistency in meta-analyses. *BMJ* **2003**, *327*, 557–560.
37. StataCorp LLC. *Stata Statistical Software: Release Vol. 16*; StataCorp LLC: College Station, TX, USA, 2019.
38. Tandon, N.; Gupta, Y.; Kapoor, D.; Lakshmi, J.K.; Praveen, D.; Bhattacharya, A.; et al. Effects of a Lifestyle Intervention to Prevent Deterioration in Glycemic Status Among South Asian Women With Recent Gestational Diabetes: A Randomized Clinical Trial. *JAMA Netw. Open* **2022**, *5*, e220773.
39. Lim, S.; Dunbar, J.A.; Versace, V.L.; Janus, E.; Wildey, C.; Skinner, T.; O'Reilly, S. Comparing a telephone-and a group-delivered diabetes prevention program: Characteristics of engaged and non-engaged postpartum mothers with a history of gestational diabetes. *Diabetes Res. Clin. Pract.* **2017**, *126*, 254–262.
40. Li, M.; Lin, Q.; Shi, J.; Xi, Y.; Xiang, C.; Yong, C.; Guo, J. The Impact of Lifestyle Intervention on Dietary Quality among Rural Women with Previous Gestational Diabetes Mellitus—A Randomized Controlled Study. *Nutrients* **2021**, *13*, 2642.
41. Lim, K.; Chan, S.-Y.; Lim, S.L.; Tai, B.C.; Tsai, C.; Wong, S.R.; Ang, S.M.; Yew, T.W.; Tai, E.S.; Yong, E.L. A Smartphone App to Restore Optimal Weight (SPAROW) in Women With Recent Gestational Diabetes Mellitus: Randomized Controlled Trial. *JMIR Mhealth Uhealth* **2021**, *9*, e22147.
42. Brokaw, S.M.; Carpenedo, D.; Campbell, P.; Butcher, M.K.; Helgersson, S.D.; Harwell, T.S. Does a History of Gestational Diabetes Mellitus Affect Key Outcomes in Women Participating in a Diabetes Prevention Program? *Matern. Child Health J.* **2018**, *22*, 529–537.
43. Guo, J.; Long, Q.; Yang, J.; Lin, Q.; Wiley, J.; Chen, J.-L. The Efficacy of an Intensive Lifestyle Modification Program on Psychosocial Outcomes among Rural Women with Prior Gestational Diabetes Mellitus: Six Months Follow-Up of a Randomized Controlled Trial. *Int. J. Environ. Res. Public Health* **2021**, *18*, 1519.

44. Reinhardt, J.A.; Van Der Ploeg, H.P.; Grzegorzulka, R.; Timperley, J.G. Implementing lifestyle change through phone-based motivational interviewing in rural-based women with previous gestational diabetes mellitus. *Health Promot. J. Aust.* **2012**, *23*, 5–9.
45. Chen, Y.; Zhong, Q.; Luo, J.; Tang, Y.; Li, M.; Lin, Q.; Willey, J.A.; Chen, J.L.; Whittemore, R.; Guo, J. The 6-month efficacy of an intensive lifestyle modification program on type 2 diabetes risk among rural women with prior gestational diabetes mellitus: A cluster randomized controlled trial. *Prev. Sci.* **2022**, *23*, 1156–1168.
46. Zhong, Q.; Chen, Y.; Luo, M.; Lin, Q.; Tan, J.; Xiao, S.; Willey, J.A.; Chen, J.L.; Whittemore, R.; Guo, J. The 18-month efficacy of an Intensive LifeStyle Modification Program (ILSM) to reduce type 2 diabetes risk among rural women: A cluster randomized controlled trial. *Glob. Health* **2023**, *19*, 6.
47. Man, B.; Schwartz, A.; Pugach, O.; Xia, Y.; Gerber, B. A clinical diabetes risk prediction model for prediabetic women with prior gestational diabetes. *PLoS ONE* **2021**, *16*, e0252501.
48. Ferrara, A.; Hedderson, M.M.; Albright, C.L.; Ehrlich, S.F.; Quesenberry, C.P., Jr.; Peng, T.; Feng, J.; Ching, J.; Crites, Y. A pregnancy and postpartum lifestyle intervention in women with gestational diabetes mellitus reduces diabetes risk factors: A feasibility randomized control trial. *Diabetes Care* **2011**, *34*, 1519–1525.
49. Ling, G.; Shufeng, W.; Xiaoming, Z.; Suhua, Y. Discussion on postpartum lifestyle intervention plan for women with gestational diabetes mellitus. *Henan J. Surg.* **2014**, *20*, 76–78.
50. Holmes, V.A.; Draffin, C.R.; Patterson, C.C.; Francis, L.; Irwin, J.; McConnell, M.; Farrell, B.; Brennan, S.F.; McSorley, O.; Wotherspoon, A.C.; et al. Postnatal lifestyle intervention for overweight women with previous gestational diabetes: A randomized controlled trial. *J. Clin. Endocrinol. Metab.* **2018**, *103*, 2478–2487.
51. McManus, R.; Miller, D.; Mottola, M.; Giroux, I.; Donovan, L. Translating healthy living messages to postpartum women and their partners after gestational diabetes (GDM): Body habitus, A1c, lifestyle habits, and program engagement results from the families Defeating diabetes (FDD) randomized trial. *Am. J. Health Promot.* **2018**, *32*, 1438–1446.
52. Nicklas, J.M.; Zera, C.A.; England, L.J.; Rosner, B.A.; Horton, E.; Levkoff, S.E.; Seely, E.W. A web-based lifestyle intervention for women with recent gestational diabetes mellitus: A randomized controlled trial. *Obstet. Gynecol.* **2014**, *124*, 563.
53. Peacock, A.; Bogossian, F.E.; Wilkinson, S.; Gibbons, K.; Kim, C.; McIntyre, H. A randomised controlled trial to delay or prevent type 2 diabetes after gestational diabetes: Walking for exercise and nutrition to prevent diabetes for you. *Int. J. Endocrinol.* **2015**, *2015*, 423717.
54. O'Dea, A.; Tierney, M.; McGuire, B.E.; Newell, J.; Glynn, L.G.; Gibson, I.; Noctor, E.; Danyliv, A.; Connolly, S.B.; Dunne, F.P. Can the onset of type 2 diabetes be delayed by a group-based lifestyle intervention in women with prediabetes following gestational diabetes mellitus (GDM)? Findings from a randomized control mixed methods trial. *J. Diabetes Res.* **2015**, *2015*, 798460.
55. Smith, B.J.; Cinnadaio, N.; Cheung, N.W.; Bauman, A.; Tapsell, L.C.; van der Ploeg, H.P. Investigation of a lifestyle change strategy for high-risk women with a history of gestational diabetes. *Diabetes Res. Clin. Pract.* **2014**, *106*, e60–e63.
56. Potzel, A.L.; Gar, C.; Banning, F.; Sacco, V.; Fritsche, A.; Fritsche, L.; Müssig, K.; Dauben, L.; Seissler, J.; Lechner, A. A novel smartphone app to change risk behaviors of women after gestational diabetes: A randomized controlled trial. *PLoS ONE* **2022**, *17*, e0267258.
57. Brazeau, A.-S.; Leong, A.; Meltzer, S.J.; Cruz, R.; DaCosta, D.; Hendrickson-Nelson, M.; Joseph, L.; Dasgupta K.; MoMM study group. Group-based activities with on-site childcare and online support improve glucose tolerance in women within 5 years of gestational diabetes pregnancy. *Cardiovasc. Diabetol.* **2014**, *13*, 104.
58. Cheung, N.W.; Smith, B.; Van Der Ploeg, H.; Cinnadaio, N.; Bauman, A. A pilot structured behavioural intervention trial to increase physical activity among women with recent gestational diabetes. *Diabetes Res. Clin. Pract.* **2011**, *92*, e27–e29.
59. Cheung, N.W. Post-pregnancy intervention for the prevention of T2 diabetes. *Obstet. Med.* **2022**, *15* (Suppl. 1), 15–16.
60. Ferrara, A.; Hedderson, M.M.; Brown, S.D.; Albright, C.L.; Ehrlich, S.F.; Tsai, A.-L.; Caan, B.J.; Sternfeld, B.; Gordon, N.P.; Schmittiel, J.A.; et al. The comparative effectiveness of diabetes prevention strategies to reduce postpartum weight retention in women with gestational diabetes mellitus: The Gestational Diabetes' Effects on Moms (GEM) cluster randomized controlled trial. *Diabetes Care* **2016**, *39*, 65–74.
61. Liu, H.; Wang, L.; Zhang, S.; Leng, J.; Li, N.; Li, W.; Wang, J.; Tian, H.; Qi, L.; Yang, X.; et al. One-year weight losses in the Tianjin Gestational Diabetes Mellitus Prevention Programme: A randomized clinical trial. *Diabetes Obes. Metab.* **2018**, *20*, 1246–1255.
62. Kapoor, D.; Gupta, Y.; Desai, A.; Praveen, D.; Joshi, R.; Rozati, R.; Bhatla, N.; Prabhakaran, D.; Reddy, P.; Patel, A. et al. Lifestyle intervention programme for Indian women with history of gestational diabetes mellitus. *Glob. Health Epidemiol. Genom.* **2019**, *4*, e1.

63. Kim, C.; Draska, M.; Hess, M.; Wilson, E.; Richardson, C. A web-based pedometer programme in women with a recent history of gestational diabetes. *Diabet. Med.* **2012**, *29*, 278–283.
64. Kim, S.-H.; Kim, H.J.; Shin, G. Self-management mobile virtual reality program for women with gestational diabetes. *Int. J. Environ. Res. Public Health* **2021**, *18*, 1539.
65. Lee, K.W.; Tan, S.F.; Omar, A.; Nasir, N.H.; Ching, S.M.; Mohd Noor, M.K.; Masdor, N.A.; Lee, Y.S.; Noordin, S.; Mohamed, H. Effectiveness of system-based intervention in reducing incidence of type 2 diabetes and to improve the postnatal metabolic profiles in women with gestational diabetes mellitus: A randomized controlled study. *Gynecol. Endocrinol.* **2022**, *38*, 55–62.
66. Aroda, V.; Christophi, C.; Edelstein, S.; Zhang, P.; Herman, W.; Barrett-Connor, E.; Delahanty, L.M.; Montez, M.G.; Ackermann, R.T.; Zhuo, X.; et al. The effect of lifestyle intervention and metformin on preventing or delaying diabetes among women with and without gestational diabetes: The Diabetes Prevention Program outcomes study 10-year follow-up. *J. Clin. Endocrinol. Metab.* **2015**, *100*, 1646–1653.
67. Ratner, R.E.; Christophi, C.A.; Metzger, B.E.; Dabelea, D.; Bennett, P.H.; Pi-Sunyer, X.; Fowler, S.; Kahn, S.E.; Diabetes Prevention Program Research Group. Prevention of diabetes in women with a history of gestational diabetes: Effects of metformin and lifestyle interventions. *J. Clin. Endocrinol. Metab.* **2008**, *93*, 4774–4779.
68. McIntyre, H.D.; Peacock, A.; Miller, Y.D.; Koh, D.; Marshall, A.L. Pilot study of an individualised early postpartum intervention to increase physical activity in women with previous gestational diabetes. *Int. J. Endocrinol.* **2012**, *2012*, 892019.
69. Barton, K.I.; Donovan, L.; Giroux, I.; Miller, D.; Mottola, M.; McManus, R. Glycated hemoglobin measurements at three, 12 and 24 months postpartum after gestational diabetes. *Clin. Investig. Med.* **2019**, *42*, E37.
70. Nicholson, W.K.; Beckham, A.J.; Hatley, K.; Diamond, M.; Johnson, L.-S.; Green, S.L.; Tate, D. The Gestational Diabetes Management System (GooDMomS): Development, feasibility and lessons learned from a patient-informed, web-based pregnancy and postpartum lifestyle intervention. *BMC Pregnancy Childbirth* **2016**, *16*, 277.
71. O'Reilly, S.; Versace, V.; Mohebbi, M.; Lim, S.; Janus, E.; Dunbar, J. The effect of a diabetes prevention program on dietary quality in women with previous gestational diabetes. *BMC Women's Health* **2019**, *19*, 88.
72. Pérez-Ferre, N.; Del Valle, L.; Torrejón, M.J.; Barca, I.; Calvo, M.I.; Matía, P.; Rubio, M.A.; Calle-Pascual, A.L. Diabetes mellitus and abnormal glucose tolerance development after gestational diabetes: A three-year, prospective, randomized, clinical-based, Mediterranean lifestyle interventional study with parallel groups. *Clin. Nutr.* **2015**, *34*, 579–585.
73. Rautio, N.; Jokelainen, J.; Korpi-Hyövälti, E.; Oksa, H.; Saaristo, T.; Peltonen, M.; Moilanen, L.; Vanhala, M.; Uusitupa, M.; Tuomilehto, J.; et al. Lifestyle intervention in prevention of type 2 diabetes in women with a history of gestational diabetes mellitus: One-year results of the FIN-D2D project. *J. Women's Health* **2014**, *23*, 506–512.
74. Shek, N.W.M.; Ngai, C.S.W.; Lee, C.P.; Chan, J.Y.C.; Lao, T.T.H. Lifestyle modifications in the development of diabetes mellitus and metabolic syndrome in Chinese women who had gestational diabetes mellitus: A randomized interventional trial. *Arch. Gynecol. Obstet.* **2014**, *289*, 319–327.
75. Yu, S.; Wen, J.W.; Miao, L.H.; Hua, H.G. Effects of lifestyle intervention on the weight of postpartum women with gestational diabetes mellitus and impaired glucose tolerance. *J. Nurs. Adm.* **2012**, *12*, 772.
76. Shyam, S.; Arshad, F.; Abdul Ghani, R.; Wahab, N.A.; Safii, N.S.; Nisak, M.Y.B.; Chinna, K.; Kamaruddin, N.A. Low glycaemic index diets improve glucose tolerance and body weight in women with previous history of gestational diabetes: A six months randomized trial. *Nutr. J.* **2013**, *12*, 68.
77. Shyam, S.; Fatimah, A.; Rohana, A.; Norasyikin, A.; Nik Shanita, S.; Chinna, K.; Mohod-Yusof B.N.; Nor, A.K. Effect of including glycaemic index (GI) nutrition education, within the conventional healthy dietary recommendation framework, on body weight and composition of women with prior gestational diabetes mellitus: Results from a one-year randomised controlled trial. *J. Nutr.* **2015**, *21*, 269–283.
78. Wein, P.; Beischer, N.; Harris, C.; Permezel, M. A trial of simple versus intensified dietary modification for prevention of progression to diabetes mellitus in women with impaired glucose tolerance. *Aust. N. Z. J. Obstet. Gynaecol.* **1999**, *39*, 162–166.
79. Yu, X.; Wu, X.; Zhang, Y.; Mao, Y. Effects of lifestyle intervention on insulin resistance and islet B-cell function in postpartum gestational diabetes patients with impaired glucose regulation. *Chin. J. Prev. Control. Chronic* **2012**, *20*, 560–562.
80. Zilberman-Kravits, D.; Meyerstein, N.; Abu-Rabia, Y.; Wiznitzer, A.; Harman-Boehm, I. The impact of a cultural lifestyle intervention on metabolic parameters after gestational diabetes mellitus a randomized controlled trial. *Matern. Child Health J.* **2018**, *22*, 803–811.

81. Yuen, L.; Saeedi, P.; Riaz, M.; Karuranga, S.; Divakar, H.; Levitt, N.; Yang, X.; Simmons, D. Projections of the prevalence of hyperglycaemia in pregnancy in 2019 and beyond: Results from the International Diabetes Federation Diabetes Atlas. *Diabetes Res. Clin. Pract.* **2019**, *157*, 107841.
82. Hamman, R.F.; Wing, R.R.; Edelstein, S.L.; Lachin, J.M.; Bray, G.A.; Delahanty, L.; Hoskin, M.; Kriska, A.M.; Mayer-Davis, E.J.; Pi-Sunyer, X.; et al. Effect of weight loss with lifestyle intervention on risk of diabetes. *Diabetes Care* **2006**, *29*, 2102–2107.
83. Carter-Edwards, L.; Østbye, T.; Bastian, L.A.; Yarnall, K.S.; Krause, K.M.; Simmons, T.-J. Barriers to adopting a healthy lifestyle: Insight from postpartum women. *BMC Res. Notes* **2009**, *2*, 161.
84. Saligheh, M.; McNamara, B.; Rooney, R. Perceived barriers and enablers of physical activity in postpartum women: A qualitative approach. *BMC Pregnancy Childbirth* **2016**, *16*, 131.
85. Al-Dhahir, I.; Reijnders, T.; Faber, J.S.; van den Berg-Emons, R.J.; Janssen, V.R.; Kraaijenhagen, R.A.; Valentijn T Visch, V.T.; Chavannes, N.H.; Evers, A.W. The barriers and facilitators of eHealth-based lifestyle intervention programs for people with a low socioeconomic status: Scoping review. *J. Med. Internet Res.* **2022**, *24*, e34229.
86. Fontil, V.; McDermott, K.; Tieu, L.; Rios, C.; Gibson, E.; Sweet, C.C.; Payne, M.; Lyles, C.R. Adaptation and feasibility study of a digital health program to prevent diabetes among low-income patients: Results from a partnership between a digital health company and an academic research team. *J. Diabetes Res.* **2016**, *2016*, 8472391.
87. Whitehead, L.; Talevski, J.; Fatehi, F.; Beauchamp, A. Barriers to and Facilitators of Digital Health Among Culturally and Linguistically Diverse Populations: Qualitative Systematic Review. *J. Med. Internet Res.* **2023**, *25*, e42719.
88. Joiner, K.L.; Nam, S.; Whittemore, R. Lifestyle interventions based on the diabetes prevention program delivered via eHealth: A systematic review and meta-analysis. *Prev. Med.* **2017**, *100*, 194–207.
89. Dugani, S.B.; Mielke, M.M.; Vella, A. Burden and management of type 2 diabetes in rural United States. *Diabetes/Metab. Res. Rev.* **2021**, *37*, e3410.
90. AIHW. Diabetes: Australian Facts. Available online: <https://www.aihw.gov.au/reports/diabetes/diabetes/contents/how-common-is-diabetes/all-diabetes> (accessed on 9 February 2023).
91. Harding, C.; Seal, A.; Mills, N. Evaluation of a Lifestyle and Weight Management Program Within Rural General Practice. *J. Prim. Care Community Health* **2022**, *13*, 21501319221084166.
92. Park, J.H.; Moon, J.H.; Kim, H.J.; Kong, M.H.; Oh, Y.H. Sedentary lifestyle: Overview of updated evidence of potential health risks. *Korean J. Fam. Med.* **2020**, *41*, 365.
93. Mbuagbaw, L.; Aves, T.; Shea, B.; Jull, J.; Welch, V.; Taljaard, M.; Yoganathan, M.; Greer-Smith, R.; Wells, G.; Tugwell, P. Considerations and guidance in designing equity-relevant clinical trials. *Int. J. Equity Health* **2017**, *16*, 93.
94. Kauh, T.J.; Minnis, T.A.; Anand, M.; Berry, M.; Gold, R. Building an Equitable Future Through Data Disaggregation. *Health Equity* **2023**, *7*, 251–260.
95. Yang, J.; Xia, Y.; Sun, Y.; Guo, Y.; Shi, Z.; do Vale Moreira, N.C.; Zuo, H.; Hussain, A. Effect of lifestyle intervention on HbA1c levels in overweight and obese adults with type 2 diabetes across ethnicities: A systematic review and meta-analysis of randomized controlled trials. *Diabetes Res. Clin. Pract.* **2023**, *199*, 110662.
96. Lynch, E.B.; Mack, L.; Avery, E.; Wang, Y.; Dawar, R.; Richardson, D.; Keim, K.; Ventrelle, J.; Appelhans, B.M.; Tahsin, B.; et al. Randomized trial of a lifestyle intervention for urban low-income African Americans with type 2 diabetes. *J. Gen. Intern. Med.* **2019**, *34*, 1174–1183.
97. Khare, M.M.; Cursio, J.F.; Locklin, C.A.; Bates, N.J.; Loo, R.K. Lifestyle intervention and cardiovascular disease risk reduction in low-income Hispanic immigrant women participating in the Illinois WISEWOMAN program. *J. Community Health* **2014**, *39*, 737–746.
98. Burgess, E.; Hassmén, P.; Pampa, K.L. Determinants of adherence to lifestyle intervention in adults with obesity: A systematic review. *Clin. Obes.* **2017**, *7*, 123–135.
99. Coupe, N.; Cotterill, S.; Peters, S. Tailoring lifestyle interventions to low socio-economic populations: A qualitative study. *BMC Public Health* **2018**, *18*, 967.
100. Fokas, E. Religion and Human Rights in Greece. In *Global Eastern Orthodoxy*; Springer: Berlin/Heidelberg, Germany, 2020; pp. 101–124.
101. Lim, F.K.; Sng, B.B. Social media, religion and shifting boundaries in globalizing China. *Glob. Media China* **2020**, *5*, 261–274.
102. Bosch-Capblanch, X.; Zuske, M.-K.; Auer, C. Research on subgroups is not research on equity attributes: Evidence from an overview of systematic reviews on vaccination. *Int. J. Equity Health* **2017**, *16*, 95.

103. Koenig, H.G. Religion, spirituality, and health: The research and clinical implications. *Int. Sch. Res. Not.* **2012**, 2012, 278730.
104. Swihart, D.L.; Yarrarapu, S.N.S.; Martin, R.L. *Cultural Religious Competence in Clinical Practice*; StatPearls Publishing: Treasure Island, FL, USA, 2018.
105. Rivenbark, J.G.; Ichou, M. Discrimination in healthcare as a barrier to care: Experiences of socially disadvantaged populations in France from a nationally representative survey. *BMC Public Health* **2020**, 20, 31.
106. Tan, S.T.; Low, P.T.A.; Howard, N.; Yi, H. Social capital in the prevention and management of non-communicable diseases among migrants and refugees: A systematic review and meta-ethnography. *BMJ Glob. Health* **2021**, 6, e006828.
107. Sanjari, M.; Aalaa, M.; Amini, M.R.; Aghaei Meybodi, H.R.; Qorbani, M.; Adibi, H.; et al. Social-capital determinants of the women with diabetes: A population-based study. *J. Diabetes Metab. Disord.* **2021**, 20, 511–521.
108. Jiang, H.; Xingling, C.; Yuxiu, H.; Feng, T. Progress and Inspiration of Social Capital in the Prevention and Control of Diabetes. *Iran. J. Public Health* **2020**, 49, 196–197.
109. Keyvanara, M.; Afshari, M.; Dezfoulan, E. The relationship between social capital and quality of life among patients referring to diabetes centers in Isfahan, Iran. *J. Diabetes Res.* **2018**, 2018, 9353858.
110. Grootaert, C. *Measuring Social Capital: An Integrated Questionnaire*; World Bank Publications: Washington, DC, USA, 2004.

**Disclaimer/Publisher's Note:** The statements, opinions and data contained in all publications are solely those of the individual author(s) and contributor(s) and not of MDPI and/or the editor(s). MDPI and/or the editor(s) disclaim responsibility for any injury to people or property resulting from any ideas, methods, instructions or products referred to in the content.
